# Supplementary material for: Transcutaneous electrical acupoint stimulation combined with electroacupuncture for rapid recovery of patients after laparotomy for gastrointestinal surgery: a study protocol for a randomised controlled trial
Source: PubMed Central journal article supplement — BMJ Open. 2021 Nov 2;11(11):e053309. doi: 10.1136/bmjopen-2021-053309 (PMC8565572; doi:10.1136/bmjopen-2021-053309), 2021-11-02
Supplement: bmjopen-2021-053309.draft_revisions.pdf [file bmjopen-2021-053309.draft_revisions.pdf]

# BMJ Open

BMJ Open is committed to open peer review. As part of this commitment we make the peer review history of every article we publish publicly available.

When an article is published we post the peer reviewers' comments and the authors' responses online. We also post the versions of the paper that were used during peer review. These are the versions that the peer review comments apply to.

The versions of the paper that follow are the versions that were submitted during the peer review process. They are not the versions of record or the final published versions. They should not be cited or distributed as the published version of this manuscript.

BMJ Open is an open access journal and the full, final, typeset and author-corrected version of record of the manuscript is available on our site with no access controls, subscription charges or pay-per-view fees (<http://bmjopen.bmj.com>).

If you have any questions on BMJ Open's open peer review process please email [info.bmjopen@bmj.com](mailto:info.bmjopen@bmj.com)

# BMJ Open

## Transcutaneous electrical acupoint stimulation combined with electroacupuncture for rapid recovery of patients after laparotomy for gastrointestinal surgery: A study protocol for a randomized controlled trial

|                               |                                                                                                                                                                                                                                                                                                                                                                                                                                                                                                                                                                                                                                                                                                                                                                                                                                                          |
|-------------------------------|----------------------------------------------------------------------------------------------------------------------------------------------------------------------------------------------------------------------------------------------------------------------------------------------------------------------------------------------------------------------------------------------------------------------------------------------------------------------------------------------------------------------------------------------------------------------------------------------------------------------------------------------------------------------------------------------------------------------------------------------------------------------------------------------------------------------------------------------------------|
| Journal:                      | <i>BMJ Open</i>                                                                                                                                                                                                                                                                                                                                                                                                                                                                                                                                                                                                                                                                                                                                                                                                                                          |
| Manuscript ID                 | bmjopen-2021-053309                                                                                                                                                                                                                                                                                                                                                                                                                                                                                                                                                                                                                                                                                                                                                                                                                                      |
| Article Type:                 | Protocol                                                                                                                                                                                                                                                                                                                                                                                                                                                                                                                                                                                                                                                                                                                                                                                                                                                 |
| Date Submitted by the Author: | 11-May-2021                                                                                                                                                                                                                                                                                                                                                                                                                                                                                                                                                                                                                                                                                                                                                                                                                                              |
| Complete List of Authors:     | Li, Hao; Sichuan University West China Hospital, Integrated Traditional and Western Medicine Department<br>Wen, Qian; Sichuan University West China Hospital, Integrated Traditional and Western Medicine Department<br>Lu, Lingyun; Sichuan University West China Hospital, Department of Integrated Traditional Chinese and Western Medicine<br>Hu, Hangqi; Sichuan University West China Hospital, Integrated Traditional and Western Medicine Department<br>He, Ying; Sichuan University West China Hospital, Integrated Traditional and Western Medicine Department<br>Zhou, Yaming; Sichuan University West China Hospital, Gastrointestinal Surgery<br>Wu, Xiaoting; Sichuan University West China Hospital, Gastrointestinal Surgery<br>Li, Ning; Sichuan University West China Hospital, Integrated Traditional and Western Medicine Department |
| Keywords:                     | COMPLEMENTARY MEDICINE, PAIN MANAGEMENT, GASTROENTEROLOGY                                                                                                                                                                                                                                                                                                                                                                                                                                                                                                                                                                                                                                                                                                                                                                                                |
|                               |                                                                                                                                                                                                                                                                                                                                                                                                                                                                                                                                                                                                                                                                                                                                                                                                                                                          |

SCHOLARONE™  
Manuscripts

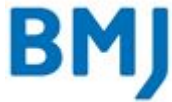

I, the Submitting Author has the right to grant and does grant on behalf of all authors of the Work (as defined in the below author licence), an exclusive licence and/or a non-exclusive licence for contributions from authors who are: i) UK Crown employees; ii) where BMJ has agreed a CC-BY licence shall apply, and/or iii) in accordance with the terms applicable for US Federal Government officers or employees acting as part of their official duties; on a worldwide, perpetual, irrevocable, royalty-free basis to BMJ Publishing Group Ltd ("BMJ") its licensees and where the relevant Journal is co-owned by BMJ to the co-owners of the Journal, to publish the Work in this journal and any other BMJ products and to exploit all rights, as set out in our [licence](#).

The Submitting Author accepts and understands that any supply made under these terms is made by BMJ to the Submitting Author unless you are acting as an employee on behalf of your employer or a postgraduate student of an affiliated institution which is paying any applicable article publishing charge ("APC") for Open Access articles. Where the Submitting Author wishes to make the Work available on an Open Access basis (and intends to pay the relevant APC), the terms of reuse of such Open Access shall be governed by a Creative Commons licence – details of these licences and which [Creative Commons](#) licence will apply to this Work are set out in our licence referred to above.

Other than as permitted in any relevant BMJ Author's Self Archiving Policies, I confirm this Work has not been accepted for publication elsewhere, is not being considered for publication elsewhere and does not duplicate material already published. I confirm all authors consent to publication of this Work and authorise the granting of this licence.

1  
2  
3  
4 **Transcutaneous electrical acupoint stimulation combined with**  
5  
6 **electroacupuncture for rapid recovery of patients after laparotomy for**  
7  
8 **gastrointestinal surgery: A study protocol for a randomized controlled trial**  
9  
10

11  
12  
13  
14 Hao Li<sup>#</sup>, Qian Wen<sup>1#</sup>, Lingyun Lu<sup>1</sup>, Hangqi Hu<sup>1</sup>, Ying He<sup>1</sup>, Yaming Zhou<sup>2</sup>, Xiaoting  
15  
16 Wu<sup>2\*</sup>, Ning Li<sup>1\*</sup>  
17  
18  
19

20  
21  
22 # Hao Li and Qian Wen contributed equally to this work.  
23

24  
25 **\* Correspondence authors:**  
26

27 Dr. Xiaoting Wu, [wxt1@medmail.com.cn](mailto:wxt1@medmail.com.cn)  
28

29 Dr. Ning Li, [zhenjiuhuaxi@163.com](mailto:zhenjiuhuaxi@163.com)  
30

31  
32 1. Department of Integrated Traditional and Western Medicine, West China Hospital  
33  
34 of Sichuan University, Chengdu, China  
35  
36

37  
38 2. Department of Gastrointestinal Surgery, West China Hospital of Sichuan  
39  
40 University, Chengdu, China  
41  
42  
43  
44  
45  
46  
47  
48  
49  
50  
51  
52  
53  
54  
55  
56  
57  
58  
59  
60

## ABSTRACT

**Introduction:** Abdominal surgery is associated with common complications, including decreased or poor appetite, abdominal distension, abdominal pain caused by decreased or absent gastrointestinal motility, anal arrest with flatus and defecation, and nausea and vomiting resulting from the use of anaesthetics and opioid analgesics. These complications seriously affect postoperative recovery, prolong hospital stay, and aggravate patient burden. This study aims to investigate for the first time the efficacy of transcutaneous electrical acupoint stimulation (TEAS) combined with electroacupuncture (EA) therapy for rapid recovery after laparotomy for gastrointestinal surgery. There have been no clinical studies of this combination therapy.

**Methods and analysis:** This will be a prospective, single-centre, three-arm, randomised controlled trial. A total of 480 patients undergoing abdominal surgery will be stratified according to surgery type (i.e. gastric or colorectal procedure) and randomised into three groups; namely, the EA, TEAS+EA, and control groups. The control group will receive enhanced recovery after surgery (ERAS)-standardised perioperative management, including preoperative education, optimising the anaesthesia scheme, avoiding intraoperative hypothermia, restrictive fluid infusion, and reducing surgical trauma. The EA group will receive electroacupuncture stimulation at L14, PC6, ST36, ST37, and ST39 based on the ERAS-standardised perioperative management. Moreover, the TEAS+EA group will receive ERAS-standardised perioperative management; electroacupuncture stimulation at the L14, PC6, ST36, ST37, and ST39;

1  
2  
3  
4 and TEAS stimulation at ST21 and SP15. The primary outcome will be the time of the  
5  
6 first postoperative spontaneous anal exhaust. Secondary outcomes will include the time  
7  
8 of first postoperative voluntary defecation, time to tolerance of a solid diet, time to first  
9  
10 ambulation, hospital duration from operation to discharge, pain and nausea vomiting  
11  
12 scores on the visual analogue scale (from 0 [no at all] to 10 [the worst]), medication  
13  
14 use, incidence of postoperative complications, and evaluation of treatment modality  
15  
16 acceptability. All statistical analyses will be performed based on the intention-to-treat  
17  
18 principle.  
19  
20  
21  
22  
23

24  
25 **Ethics and dissemination** Ethics approval has been granted by the Ethics Committee  
26  
27 on Biomedical Research, West China Hospital of Sichuan University (approval number:  
28  
29 2021; number 52). The results are expected to be published in peer-reviewed journals.  
30  
31  
32

33  
34 **Trial registration number:** ChiCTR2100045646 (Chinese Clinical Trial Registry)  
35  
36

### 37 **Strengths and limitations of this study**

38  
39

- 40 • A randomised controlled trial of 480 patients will be conducted to evaluate the  
41 efficacy of TEAS combined with EA therapy for rapid recovery after  
42 laparotomy for gastrointestinal surgery.  
43  
44
- 45 • The trial feasibility has been examined in a pilot randomised trial of 60 patients.  
46  
47
- 48 • This trial will be conducted using rigorous methods; for example, the patients  
49 will be randomly assigned to three groups; the data will undergo blind statistical  
50 analysis; and the interventionists, efficacy evaluators, and statisticians will be  
51 separated.  
52  
53  
54  
55  
56  
57  
58  
59  
60

- There is no placebo effect in the control group.

## INTRODUCTION

The most common postoperative complications in laparotomy for gastrointestinal surgery include gastrointestinal dysfunction, pain, postoperative nausea and vomiting (PONV), etc. These result from numerous factors, including the intraoperative use of anaesthetic drugs, surgical trauma, peritoneal irritation or inflammatory response, and postoperative use of analgesic drugs<sup>1-3</sup>. Rapid postoperative rehabilitation can prevent or reduce intraperitoneal adhesion; reduce the incidence of complications, including intestinal obstruction and intestinal infection; prevent secondary surgery, reduce opioid usage, and alleviate pain. Moreover, it can promote prompt recovery of the patients' oral diet, reduce the use of parenteral nutrition, shorten the hospitalisation duration, and reduce hospitalisation costs<sup>4-8</sup>.

Enhanced recovery after surgery (ERAS) is based on evidence-based medicine and is a standardised, collaborative, and multidisciplinary optimisation management protocol for the perioperative period. It allows a reduction in the physiological and psychological traumatic stress response, as well as postoperative complications; a faster postoperative recovery; a shorter postoperative hospitalisation time; and a reduction in patient costs<sup>9</sup>. This concept was initially proposed by the Danish Medical Scientist Kehlet in 1997<sup>10</sup>. After > 20 years of practice and optimisation, the ERAS concept and pathway have been popularised and rapidly applied worldwide<sup>11</sup>. Although a series of perioperative ERAS measures can accelerate recovery, there remains room for

1  
2  
3  
4 improvement in the prevention and treatment of postoperative gastrointestinal  
5  
6 dysfunction and PONV, as well as in the reduction of opioid use.  
7  
8

9 Acupuncture exerts therapeutic effects by regulating gastrointestinal dynamics,  
10  
11 analgesia, and antiemetics. It is widely considered that a degree of postoperative  
12  
13 gastrointestinal dysfunction is an inevitable normal physiological response after  
14  
15 abdominal surgery<sup>12</sup>. Several studies have demonstrated that acupuncture can  
16  
17 significantly relieve postoperative abdominal pain and distension, promote intestinal  
18  
19 ventilation, and promptly restore the patient's diet<sup>13 14</sup>. Acupuncture can enhance gastric  
20  
21 dilatation through the sympathetic nerve to promote gastric emptying<sup>15 16</sup>; moreover,  
22  
23 the vasoactive intestinal peptide is involved in electroacupuncture-mediated gastric  
24  
25 motility regulation.  
26  
27  
28  
29  
30  
31

32 Additionally, acupuncture can facilitate postoperative multimodal analgesia.  
33  
34 Postoperative analgesia is among the core ERAS components. Its principles include  
35  
36 sufficient analgesia and minimisation of opioid usage. Adequate postoperative  
37  
38 analgesia can reduce excessive stress, help patients get out of bed quickly, and promote  
39  
40 recovery. Opioids, which are the main traditional postoperative analgesic drugs, can  
41  
42 easily cause postoperative nausea, vomiting, and other complications. Reducing opioid  
43  
44 usage allows early recovery of patients. There have been numerous studies on the  
45  
46 mechanisms underlying acupuncture analgesia from the perspectives of  
47  
48 electrophysiology, neurochemistry, molecular biology, and brain imaging<sup>17-19</sup>.  
49  
50  
51 Moreover, numerous clinical studies have shown that acupuncture can significantly  
52  
53 reduce postoperative pain and opioid use after total hip replacement, craniotomy,  
54  
55  
56  
57  
58  
59  
60



1  
2  
3  
4 abdominal surgery, and kidney stone surgery<sup>20-23</sup>. Therefore, based on the ERAS  
5  
6 clinical pathway, acupuncture analgesia may better control wound pain and reduce the  
7  
8 use of analgesics, including opioids, and therefore accelerate patient recovery.  
9

10  
11 PONV is a common complication after surgical anaesthesia and analgesia with  
12  
13 opioids that can cause dehydration, electrolyte imbalance, wound cracking, and  
14  
15 discharge delay. PONV is another important factor that affects the recovery of patients<sup>24</sup>.  
16  
17 Studies have shown that Neiguan (PC6) stimulation can effectively prevent PONV<sup>25,26</sup>.  
18  
19 Transcutaneous electrical acupoint stimulation (TEAS) is more effective than  
20  
21 intravenous ondansetron; additionally, using TEAS combined with drugs can enhance  
22  
23 the anti-emetic effects of ondansetron<sup>27</sup>.  
24  
25  
26  
27  
28

29  
30 Numerous studies have supported the application of acupuncture in postoperative  
31  
32 rehabilitation; however, there are differences in efficacy across different acupuncture  
33  
34 schemes. Currently, EA is the most common acupuncture scheme for rapid  
35  
36 postoperative rehabilitation, with TEAS being the second most common scheme.  
37  
38 Although TEAS avoids pain resulting from acupuncture needles, its efficacy is slightly  
39  
40 worse than that of EA and it has relatively limited clinical application. However, our  
41  
42 previous clinical experience and preliminary trials suggested that combining TEAS  
43  
44 with EA may have a better curative effect than the conventional electroacupuncture  
45  
46 treatment. Moreover, this combination could provide an improved acupuncture  
47  
48 treatment protocol for rapid rehabilitation after laparotomy for gastrointestinal surgery.  
49  
50  
51 It may promote the recovery of gastrointestinal function more quickly, reduce pain  
52  
53  
54  
55  
56  
57  
58  
59  
60

1  
2  
3  
4 more obviously, shorten the duration of postoperative hospital stay, and reduce patient  
5  
6 hospitalization costs, etc.  
7

8  
9 Therefore, this prospective, single-centre, three-arm, single-blind, randomised  
10  
11 controlled trial (RCT) aims to evaluate the efficacy of TEAS combined with EA therapy  
12  
13 for rapid recovery after laparotomy for gastrointestinal surgery.  
14  
15

## 16 17 18 **METHODS AND ANALYSIS**

### 19 20 21 **Design**

22  
23 This will be a single-centre, prospective RCT with a three-arm parallel grouping design.

24  
25 The trial protocol version number: 2.0, date 31th March,2021.The study will be  
26  
27 conducted at the West China Hospital of Sichuan University (WCHSU) from April  
28  
29 2021 to March 2023. All the participants will be required to provide written informed  
30  
31 consent in accordance with the most recent version of the Declaration of Helsinki.  
32  
33

34  
35  
36 Figure 1 presents the study flowchart.  
37  
38  
39  
40  
41  
42  
43  
44

### 45 46 47 **Patient population and setting**

48  
49 A total of 480 Chinese patients undergoing laparotomy for gastrointestinal surgery will  
50  
51 be sequentially enrolled at the WCHSU after fulfilling the eligibility criteria and signing  
52  
53 informed consent. A clinical assistant with institutional review board training will be in  
54  
55 charge of patient enrolment.  
56

### 57 58 59 **Eligibility criteria**

60

1  
2  
3  
4 *The inclusion criteria will be as follows:* (1) male and female patients aged 18–70 years;  
5  
6 (2) laparotomy tumour resection under general anaesthesia (stomach, colon, and  
7  
8 rectum); and (3) volunteering to participate in this study and signing an informed  
9  
10 consent form.  
11  
12

13  
14 *The exclusion criteria will be as follows:* (1) surgical incision or scar on the  
15  
16 meridian of ST21/SP15, (2) local skin infection at acupoints, (3) inability to complete  
17  
18 the visual analogue scale (VAS), and (4) allergy to metal or severe needle fear,  
19  
20 intolerance of TEAS or EA treatment, (5) uncontrolled diabetes, severe cardiac, central  
21  
22 nervous, psychiatric disorders, or coagulopathy; (6) cardiac pacemaker; and (7)  
23  
24 participation in other clinical trials.  
25  
26  
27  
28

29  
30 *Withdrawal criteria:* Participants meeting any of the following criteria will be  
31  
32 withdrawn from the study: (1) occurrence of serious adverse events; (2) participants  
33  
34 with serious complications or other serious diseases requiring emergency measures, (3)  
35  
36 being required to withdraw during the test, and (4) violation of the test program.  
37  
38  
39  
40 Withdrawn patients will not be replaced.  
41  
42  
43  
44  
45

### 46 **Randomisation and blinding**

47  
48 This study will have a single-blind design. The patient will be blinded to the group  
49  
50 allocation; moreover, patients in the same ward will be separated by a bed curtain when  
51  
52 receiving acupuncture treatment, with only the research leader and acupuncturist being  
53  
54 aware of the treatment allocation. The randomised grouping plan will be designed using  
55  
56 SPSS 22.0. According to the plan, 480 patients will be randomly divided into three  
57  
58  
59  
60

1  
2  
3  
4 groups according to a ratio of 1:1:1: EA, TEAS+EA, and control groups. The group  
5  
6 scheme will be kept in a confidential envelope; further, the research leader will  
7  
8 randomly distribute the included patients to each group following the distribution plan  
9  
10 in the envelope. Additionally, the research leader will only inform the acupuncturist  
11  
12 responsible for the operation. Efficacy evaluation will be conducted blinded to the  
13  
14 grouping allocation. Blind statistical analysis will be used in the data summary stage.  
15  
16  
17 Operators, efficacy evaluators, and statisticians will be separated.  
18  
19  
20  
21  
22  
23  
24

## 25 **INTERVENTION**

26  
27 All acupoints will be determined based on the National Standard of Location of  
28  
29 Acupoints (GB 12346-90). All practitioners performing the treatment must have an  
30  
31 acupuncturist qualification certificate with independent clinical experience for > 2 years.  
32  
33  
34 The acupuncturists will not be replaced during the experiments.  
35  
36  
37

38 All patients will receive standardised perioperative management by ERAS,  
39  
40 including preoperative education, optimisation of anaesthesia scheme, avoidance of  
41  
42 intraoperative hypothermia, restrictive fluid infusion, and reduction of surgical trauma.  
43  
44 Regarding the electronic acupuncture treatment instrument (Hwato, SDZ-V, Suzhou  
45  
46 Medical Supplies Factory Co., Ltd), the current frequency will be continuous wave 2  
47  
48 Hz, the current intensity will be measured in degrees as tolerated by the patient;  
49  
50 moreover, the treatment duration will last 30 min (figure 2). The treatment will be  
51  
52 initiated from the first postoperative day, once daily in the morning, until the patient  
53  
54 recovered spontaneous flatus from the anus and could tolerate transoral solid food.  
55  
56  
57  
58  
59  
60

1  
2  
3  
4  
5  
6  
7 In the EA group (electroacupuncture is added at the base of basic treatment),  
8  
9 treatment will be bilaterally performed at five acupoint pairs: Hegu (LI4), Neiguan  
10  
11 (PC6), Zusanli (ST36), Shangjuxu (ST37), and Xiajuxu (ST39). LI4 is an acupoint of  
12  
13 the large intestine meridian and is located on the dorsum of the hand between the first  
14  
15 and second metacarpal bones. PC6 belongs to the pericardium meridian and is located  
16  
17 between the flexor carpi radialis muscle tendon and the palmaris longus tendon, 2 Cun  
18  
19 above the wrist crease. ST36, ST37, and ST39 are acupoints of the stomach meridian.  
20  
21 ST36 is located on the lateral side of the lower leg, 3 Cun below the lateral border of  
22  
23 the knee and one finger width lateral to the anterior border of the tibia. ST37 is located  
24  
25 3 Cun below ST36. ST39 is located 3 Cun below ST37. After skin disinfection with a  
26  
27 disposable disinfecting cotton swab, sterile and disposable stainless steel needles  
28  
29 (0.25×40 mm, Suzhou Jiajian, Jiangsu, China) will be quickly and perpendicularly  
30  
31 inserted into the skin acupoints at a depth of 25–30 mm. The duration of reinforcing-  
32  
33 reducing manipulation of twirling and rotating needles should be used for 1 min to  
34  
35 achieve de qi (a composite of sensations including soreness, numbness, distention,  
36  
37 heaviness, and other sensations), which significantly contributes to acupuncture  
38  
39 efficacy. The ipsilateral Neiguan, Hegu, Zusanli, and Xiajuxu will be separately  
40  
41 connected to one electrode set, and therefore yielding four electrode sets (figure 3 a, b).  
42  
43  
44  
45  
46  
47  
48  
49  
50  
51

52  
53 For the TEAS+EA group, treatment will be based on the EA group with the  
54  
55 addition of two pairs of bilateral abdominal acupoints: Liangmen (ST21) and Daheng  
56  
57 (SP15). Additionally, ST21 is an acupoint of the stomach meridian that is located 4 Cun  
58  
59  
60

1  
2  
3  
4 above the umbilicus and 2 Cun open next to the anterior median line. SP15 is an  
5  
6 acupoint of the spleen meridian, located 4 Cun beside the umbilicus and lateral to the  
7  
8 rectus abdominis muscle. Abdominal acupoints will be stimulated using a self-adhesive  
9  
10 electrode pad with electrical conductivity; additionally, the ipsilateral Liangmen will  
11  
12 be connected to the Daheng set of electrodes. The ipsilateral Neiguan, Hegu, Zusanli,  
13  
14 and Xiajuxu acupoints will be connected to one electrode set to yield a total of six sets  
15  
16 of electrodes (figure 3 a, b, c).  
17  
18  
19  
20  
21

22 The control group will receive ERAS-standardised perioperative management  
23  
24 without acupuncture treatment.  
25  
26  
27  
28  
29

## 30 **OUTCOME MEASURES**

### 31 **Main outcome**

32  
33  
34  
35 The primary outcome will be the time of the first postoperative spontaneous anal  
36  
37 exhaust. The observer will be assessments and visits for participants after each treatment.  
38  
39

### 40 **Secondary outcome**

41  
42  
43 The secondary outcomes include the time of first postoperative voluntary defecation,  
44  
45 time to tolerance of a solid diet, time to first ambulation, hospital duration from  
46  
47 operation to discharge, pain and nausea vomiting scores on the VAS (from 0 [no at all]  
48  
49 to 10 [the worst]), medication use, incidence of postoperative complications, and  
50  
51 evaluation of treatment modality acceptability. The observer will be assessments and  
52  
53 visits for participants after each treatment.  
54  
55  
56  
57

### 58 **Safety evaluation**

1  
2  
3  
4 All adverse events will be recorded on the adverse event record sheet by the  
5  
6 acupuncturist and participants at any time during the study period. Adverse events to  
7  
8 be recorded include fainting during acupuncture treatment, needle breaking, unbearable  
9  
10 acupuncture pain, local hematoma, infection, and any other discomfort or accident. The  
11  
12 intensity and causality of each adverse event will be evaluated and recorded. If any  
13  
14 serious adverse events occur due to an intervention, the intervention will be  
15  
16 immediately stopped; further, appropriate corrective action will be taken. Serious  
17  
18 adverse events will be promptly reported to the institutional review board within 24 h  
19  
20 until 30 days after the end of the trial.  
21  
22  
23  
24  
25

### 26 27 **Sample size calculation** 28

29  
30 The stratification factors will be gastrectomy and colorectal resection, with each layer  
31  
32 being divided into three groups: the group ratio will be 1:1:1. The main efficacy  
33  
34 indicator will be the time from the laparotomy surgery to the first flatus. Given the lack  
35  
36 of reports on TEAS+EA for promoting postoperative recovery, we conducted a  
37  
38 preliminary experiment. The preliminary experimental results indicated that the time  
39  
40 spent from laparotomy gastrectomy surgery to the first flatus in the control, EA, and  
41  
42 TEAS+EA groups was  $62.5 \pm 26.7$  h,  $48 \pm 24.5$  h, and  $45.7 \pm 28.2$  h, respectively,  
43  
44  
45 Additionally, in the control group, the time from the laparotomy colorectal surgery to  
46  
47 the first flatus was the control, EA, and TEAS+EA groups was  $63.6 \pm 24.6$  h,  $50.5 \pm$   
48  
49  $23.6$  h, and  $47.5 \pm 25.2$  h, respectively. The sample size was determined using PASS 11  
50  
51 with  $\alpha = 0.05$  (two-sided) and  $\beta = 0.1$  (90% power). The required sample size will be  
52  
53  
54  
55  
56  
57  
58  
59  
60 72 patients per group. Assuming that 10% of patients will be lost to follow-up, we chose

1  
2  
3  
4 a sample size of 80 participants for each group, with a total sample size of 480  
5  
6 participants.  
7

### 8 9 **Statistical analyses**

10  
11 Statistical analysis will be conducted by independent third-party professional  
12  
13 statisticians. All data will be collected by statisticians. Data analysis will be performed  
14  
15 using the intention processing principle in SPSS 22.0. Statistical results will be reported  
16  
17 using a two-sided test, with statistical significance being set at P-value < 0.05. The  
18  
19 results will be expressed as mean  $\pm$  standard deviation. The t-test will be used for  
20  
21 normally distributed homogenous variables, with the hypothesis test of superiority  
22  
23 being used for major outcome indicators, the chi-square test for normally distributed  
24  
25 data, and the rank-sum test or Fisher's exact probability method for non-normally  
26  
27 distributed data.  
28  
29  
30  
31  
32  
33

### 34 35 **Patient and public involvement**

36  
37 The patients and the public were not involved in the planning and design of this study.  
38  
39 The present trial was developed by acupuncturists based on previous clinical experience  
40  
41 and literature. The expected outcomes are commonly used to assess rapid postoperative  
42  
43 recovery in clinical practice. The cost of interventions and outcome measurements will  
44  
45 be maintained using the study funding; therefore, it was not considered a significant  
46  
47 burden and met the patient preferences. The results will be disseminated to the  
48  
49 participants via the WCHSU website.  
50  
51  
52  
53  
54  
55  
56  
57  
58  
59  
60



## DISCUSSION

Several studies have demonstrated the efficacy of acupuncture in rapid postoperative rehabilitation<sup>28</sup>. Previous clinical experience and studies have shown that acupuncture on the distal limb acupoints is mostly selected for rehabilitation after abdominal surgery, which may be associated with several factors, including the presence of surgical wounds after abdominal surgery, postoperative changes in the structure and state of abdominal organs affecting acupuncture needle manipulation, and safety. However, recent studies have shown that abdominal and limb acupoints facilitate improvement of abdominal pain and the distension degree; moreover, abdominal acupoints have a more optimal effect on improving the degree of abdominal pain<sup>29</sup>. In this study, based on extensive clinical practice, TEAS will be applied to abdominal acupoints, which is safer than electroacupuncture based on acupuncture on the meridians of the distal extremities; moreover, the bilateral beam gate and large transverse acupoints chosen for abdominal surgery are unconventional incision positions that facilitate manipulation. Additionally, they are both antiemetic, promote gastrointestinal motility, and relieve abdominal pain. Therefore, this randomised controlled study will evaluate whether TEAS combined with EA therapy is effective at allowing rapid recovery after laparotomy for gastrointestinal surgery is more effective and beneficial, and therefore further improving patient satisfaction.

## ETHICS AND DISSEMINATION

Personal information and study data of all participants will be recorded in case report forms. Moreover, data involving patient privacy will be anonymized, protected by code, and securely kept in a locked cabinet in the WCHSU accessed only by the research team. Upon completion of the trial and data verification, the case report forms will be transferred to the Science and Technology Department of Sichuan Province for safe archival purposes for 10 years before being destroyed. Data for use or analysis following study completion will be available from the corresponding author upon reasonable request. The study results will be presented at national and international scientific conferences and submitted for publication in a peer-reviewed journal.

This study has been approved by the Ethics Committee on Biomedical Research, West China Hospital of Sichuan University in April 2021. The approval number is 2021 (52).

The trial protocol strictly adheres to the principles of the latest Declaration of Helsinki.

Patient consent for publication is not required.

**Authors' contributions:** HL and QW contributed equally to this article, participated in the study design, drafted the manuscript, and recruited patients. L-y L and Y-m Z are responsible for the treatment of patients. H-q H and YH are responsible for collecting the data. NL and X-d W are responsible for monitoring this study. All authors contributed to manuscript revision and have read and approved the submitted version.

1  
2  
3  
4 **Funding:** This study will be supported by the Sichuan Science and Technology  
5  
6 Program (grant number: 2021YFS0254).  
7  
8  
9

10  
11 **Disclaimer:** The funding bodies are not involved in study design, data collection,  
12  
13 analysis, interpretation of results, and the manuscript.  
14  
15  
16  
17

18  
19 **Competing interests:** The authors declare that they have no competing interests.  
20  
21  
22

23  
24 **Provenance and peer review:** Not commissioned; externally peer-reviewed.  
25  
26  
27  
28  
29  
30

## 31 REFERENCES

- 32 1. Leslie JB, Viscusi ER, Pergolizzi JV, Jr., et al. Anesthetic Routines: The Anesthesiologist's Role in GI  
33 Recovery and Postoperative Ileus. *Adv Prev Med* 2011;2011:976904. doi:  
34 10.4061/2011/976904 [published Online First: 2011/10/13]  
35
- 36 2. Gan TJ, Belani KG, Bergese S, et al. Fourth Consensus Guidelines for the Management of  
37 Postoperative Nausea and Vomiting. *Anesth Analg* 2020;131(2):411-48. doi:  
38 10.1213/ANE.0000000000004833 [published Online First: 2020/05/30]  
39
- 40 3. Bragg D, El-Sharkawy AM, Psaltis E, et al. Postoperative ileus: Recent developments in  
41 pathophysiology and management. *Clinical nutrition (Edinburgh, Scotland)* 2015;34(3):367-76.  
42 doi: 10.1016/j.clnu.2015.01.016 [published Online First: 2015/03/31]  
43
- 44 4. Ni CY, Wang ZH, Huang ZP, et al. Early enforced mobilization after liver resection: A prospective  
45 randomized controlled trial. *International journal of surgery (London, England)* 2018;54(Pt  
46 A):254-58. doi: 10.1016/j.ijssu.2018.04.060 [published Online First: 2018/05/13]  
47
- 48 5. Ren QP, Luo YL, Xiao FM, et al. Effect of enhanced recovery after surgery program on patient-reported  
49 outcomes and function recovery in patients undergoing liver resection for hepatocellular  
50 carcinoma. *Medicine* 2020;99(20):e20062. doi: 10.1097/md.00000000000020062 [published  
51 Online First: 2020/05/24]  
52
- 53 6. Harryman C, Plymale MA, Stearns E, et al. Enhanced value with implementation of an ERAS protocol  
54 for ventral hernia repair. *Surgical endoscopy* 2020;34(9):3949-55. doi: 10.1007/s00464-019-  
55 07166-2 [published Online First: 2019/10/03]  
56  
57  
58  
59  
60

- 1  
2  
3 7. Medbery RL, Fernandez FG, Khullar OV. ERAS and patient reported outcomes in thoracic surgery: a  
4 review of current data. *Journal of thoracic disease* 2019;11(Suppl 7):S976-s86. doi:  
5 10.21037/jtd.2019.04.08 [published Online First: 2019/06/12]  
6
- 7 8. Noba L, Rodgers S, Chandler C, et al. Enhanced Recovery After Surgery (ERAS) Reduces Hospital Costs  
8 and Improve Clinical Outcomes in Liver Surgery: a Systematic Review and Meta-Analysis.  
9 *Journal of gastrointestinal surgery : official journal of the Society for Surgery of the Alimentary*  
10 *Tract* 2020;24(4):918-32. doi: 10.1007/s11605-019-04499-0 [published Online First:  
11 2020/01/05]  
12
- 13 9. Ljungqvist O, Scott M, Fearon KC. Enhanced Recovery After Surgery: A Review. *JAMA surgery*  
14 2017;152(3):292-98. doi: 10.1001/jamasurg.2016.4952 [published Online First: 2017/01/18]  
15
- 16 10. Wilmore DW, Kehlet H. Management of patients in fast track surgery. *BMJ (Clinical research ed)*  
17 2001;322(7284):473-6. doi: 10.1136/bmj.322.7284.473 [published Online First: 2001/02/27]  
18
- 19 11. McLeod RS, Aarts MA, Chung F, et al. Development of an Enhanced Recovery After Surgery Guideline  
20 and Implementation Strategy Based on the Knowledge-to-action Cycle. *Annals of surgery*  
21 2015;262(6):1016-25. doi: 10.1097/sla.0000000000001067 [published Online First:  
22 2015/02/19]  
23
- 24 12. Miedema BW, Johnson JO. Methods for decreasing postoperative gut dysmotility. *Lancet Oncol*  
25 2003;4(6):365-72. doi: 10.1016/s1470-2045(03)01118-5 [published Online First: 2003/06/06]  
26
- 27 13. Li H, He T, Xu Q, et al. Acupuncture and regulation of gastrointestinal function. *World journal of*  
28 *gastroenterology* 2015;21(27):8304-13. doi: 10.3748/wjg.v21.i27.8304 [published Online First:  
29 2015/07/29]  
30
- 31 14. Ng SS, Leung WW, Mak TW, et al. Electroacupuncture reduces duration of postoperative ileus after  
32 laparoscopic surgery for colorectal cancer. *Gastroenterology* 2013;144(2):307-13.e1. doi:  
33 10.1053/j.gastro.2012.10.050 [published Online First: 2012/11/13]  
34
- 35 15. Takahashi T. Mechanism of acupuncture on neuromodulation in the gut--a review.  
36 *Neuromodulation : journal of the International Neuromodulation Society* 2011;14(1):8-12;  
37 discussion 12. doi: 10.1111/j.1525-1403.2010.00295.x [published Online First: 2011/10/14]  
38
- 39 16. Tada H, Fujita M, Harris M, et al. Neural mechanism of acupuncture-induced gastric relaxations in  
40 rats. *Digestive diseases and sciences* 2003;48(1):59-68. doi: 10.1023/a:1021730314068  
41 [published Online First: 2003/03/21]  
42
- 43 17. Zhao ZQ. Neural mechanism underlying acupuncture analgesia. *Progress in neurobiology*  
44 2008;85(4):355-75. doi: 10.1016/j.pneurobio.2008.05.004 [published Online First: 2008/06/28]  
45
- 46 18. Hauck M, Schröder S, Meyer-Hamme G, et al. Acupuncture analgesia involves modulation of pain-  
47 induced gamma oscillations and cortical network connectivity. *Scientific reports*  
48 2017;7(1):16307. doi: 10.1038/s41598-017-13633-4 [published Online First: 2017/11/28]  
49
- 50 19. Cui X, Liu K, Xu D, et al. Mast cell deficiency attenuates acupuncture analgesia for mechanical pain  
51 using c-kit gene mutant rats. *Journal of pain research* 2018;11:483-95. doi:  
52 10.2147/jpr.S152015 [published Online First: 2018/03/20]  
53
- 54 20. Wu MS, Chen KH, Chen IF, et al. The Efficacy of Acupuncture in Post-Operative Pain Management:  
55 A Systematic Review and Meta-Analysis. *PloS one* 2016;11(3):e0150367. doi:  
56 10.1371/journal.pone.0150367 [published Online First: 2016/03/10]  
57
- 58 21. Capodice JL, Parkhomenko E, Tran TY, et al. A Randomized, Double-Blind, Sham-Controlled Study  
59 Assessing Electroacupuncture for the Management of Postoperative Pain after Percutaneous  
60

- 1  
2  
3 Nephrolithotomy. *Journal of endourology* 2019;33(3):194-200. doi: 10.1089/end.2018.0665  
4 [published Online First: 2019/01/30]  
5  
6 22. Chen CC, Yang CC, Hu CC, et al. Acupuncture for pain relief after total knee arthroplasty: a  
7 randomized controlled trial. *Regional anesthesia and pain medicine* 2015;40(1):31-6. doi:  
8 10.1097/aap.000000000000138 [published Online First: 2014/08/28]  
9  
10 23. Asmussen S, Maybauer DM, Chen JD, et al. Effects of Acupuncture in Anesthesia for Craniotomy: A  
11 Meta-Analysis. *Journal of neurosurgical anesthesiology* 2017;29(3):219-27. doi:  
12 10.1097/ana.000000000000290 [published Online First: 2016/03/12]  
13  
14 24. Kovac AL. Update on the management of postoperative nausea and vomiting. *Drugs*  
15 2013;73(14):1525-47. doi: 10.1007/s40265-013-0110-7 [published Online First: 2013/09/24]  
16  
17 25. Lee A, Chan SK, Fan LT. Stimulation of the wrist acupuncture point PC6 for preventing postoperative  
18 nausea and vomiting. *The Cochrane database of systematic reviews* 2015;2015(11):Cd003281.  
19 doi: 10.1002/14651858.CD003281.pub4 [published Online First: 2015/11/03]  
20  
21 26. Kim YH, Kim KS, Lee HJ, et al. The efficacy of several neuromuscular monitoring modes at the P6  
22 acupuncture point in preventing postoperative nausea and vomiting. *Anesth Analg*  
23 2011;112(4):819-23. doi: 10.1213/ANE.0b013e31820f819e [published Online First:  
24 2011/03/10]  
25  
26 27. Gan TJ, Jiao KR, Zenn M, et al. A randomized controlled comparison of electro-acupoint stimulation  
27 or ondansetron versus placebo for the prevention of postoperative nausea and vomiting.  
28 *Anesth Analg* 2004;99(4):1070-5, table of contents. doi:  
29 10.1213/01.Ane.0000130355.91214.9e [published Online First: 2004/09/24]  
30  
31 28. Xin C, Sun JH. [The value of acupuncture-moxibustion in enhance recovery after surgery]. *Zhongguo*  
32 *Zhen Jiu* 2020;40(6):679-82. doi: 10.13703/j.0255-2930.20190501-0005 [published Online  
33 First: 2020/06/17]  
34  
35 29. Li HJ, Zhao Y, Wen Q, et al. [Comparison of Clinical Effects of Electroacupuncture of Abdominal and  
36 Limb Acupoints in the Treatment of Acute Pancreatitis]. *Zhen Ci Yan Jiu* 2018;43(11):725-9.  
37 doi: 10.13702/j.1000-0607.170351 [published Online First: 2018/12/27]  
38  
39  
40  
41

## 42 **Figure Legends**

43  
44 Figure 1: Flowchart of the study protocol.

45  
46 Figure 2: Instrument and parameter.

47  
48 Figure 3a: Location and electrode connection of upper limb acupoints.

49  
50 Figure 3b: Location and electrode connection of lower limb acupoints.

51  
52 Figure 3c: Location and electrode connection of abdominal acupoints.  
53  
54  
55  
56  
57  
58  
59  
60

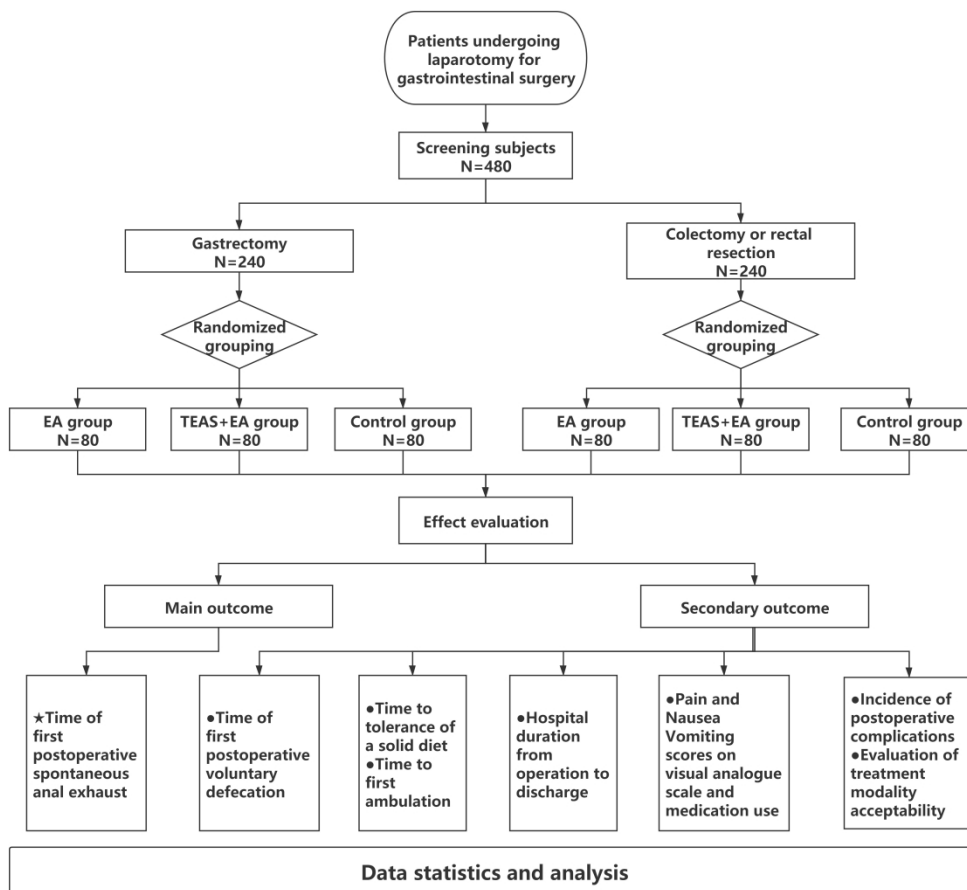

Figure 1: Flowchart of the study protocol.

1709x1560mm (72 x 72 DPI)

1  
2  
3  
4  
5  
6  
7  
8  
9  
10  
11  
12  
13  
14  
15  
16  
17  
18  
19  
20  
21  
22  
23  
24  
25  
26  
27  
28  
29  
30  
31  
32  
33  
34  
35  
36  
37  
38  
39  
40  
41  
42  
43  
44  
45  
46  
47  
48  
49  
50  
51  
52  
53  
54  
55  
56  
57  
58  
59  
60

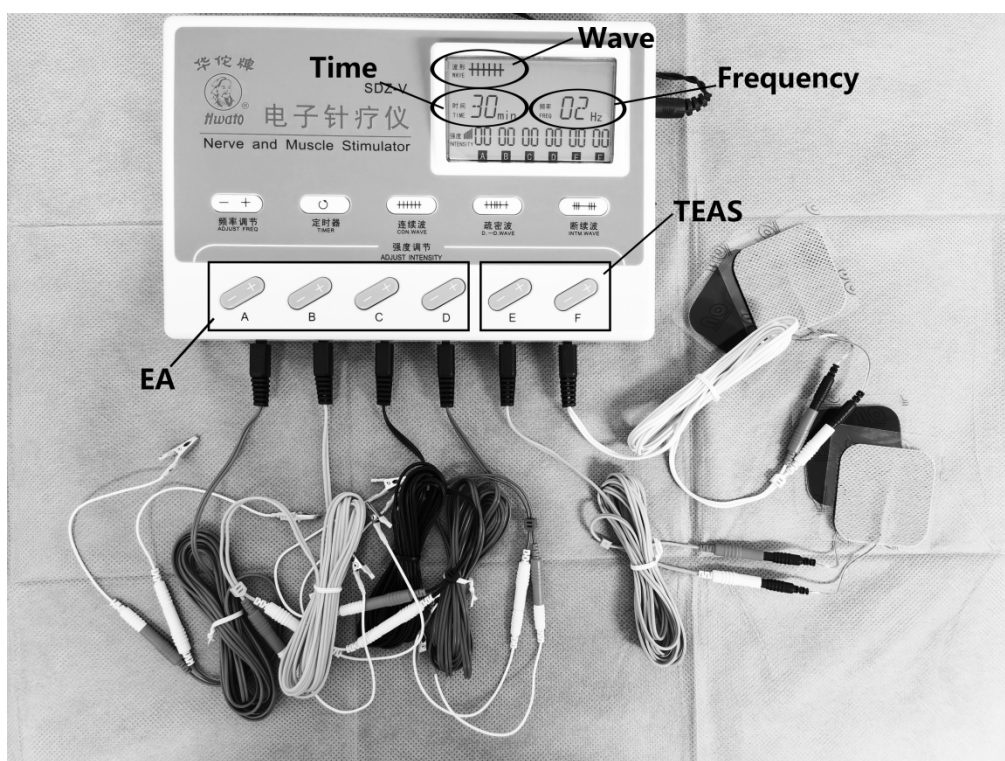

Figure 2: Instrument and parameter.

1286x965mm (72 x 72 DPI)

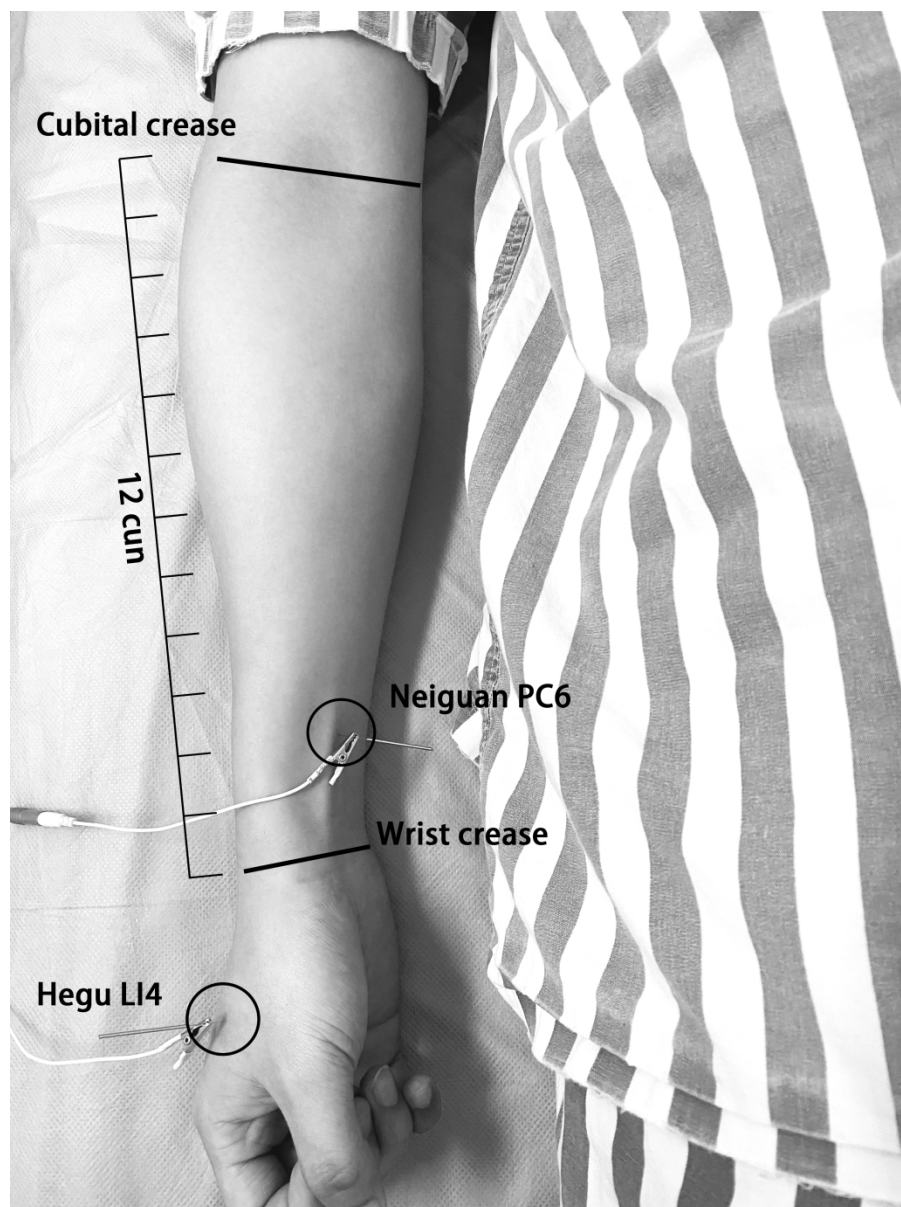

Figure 3a: Location and electrode connection of upper limb acupoints.

1066x1422mm (72 x 72 DPI)



1  
2  
3  
4  
5  
6  
7  
8  
9  
10  
11  
12  
13  
14  
15  
16  
17  
18  
19  
20  
21  
22  
23  
24  
25  
26  
27  
28  
29  
30  
31  
32  
33  
34  
35  
36  
37  
38  
39  
40  
41  
42  
43  
44  
45  
46  
47  
48  
49  
50  
51  
52  
53  
54  
55  
56  
57  
58  
59  
60

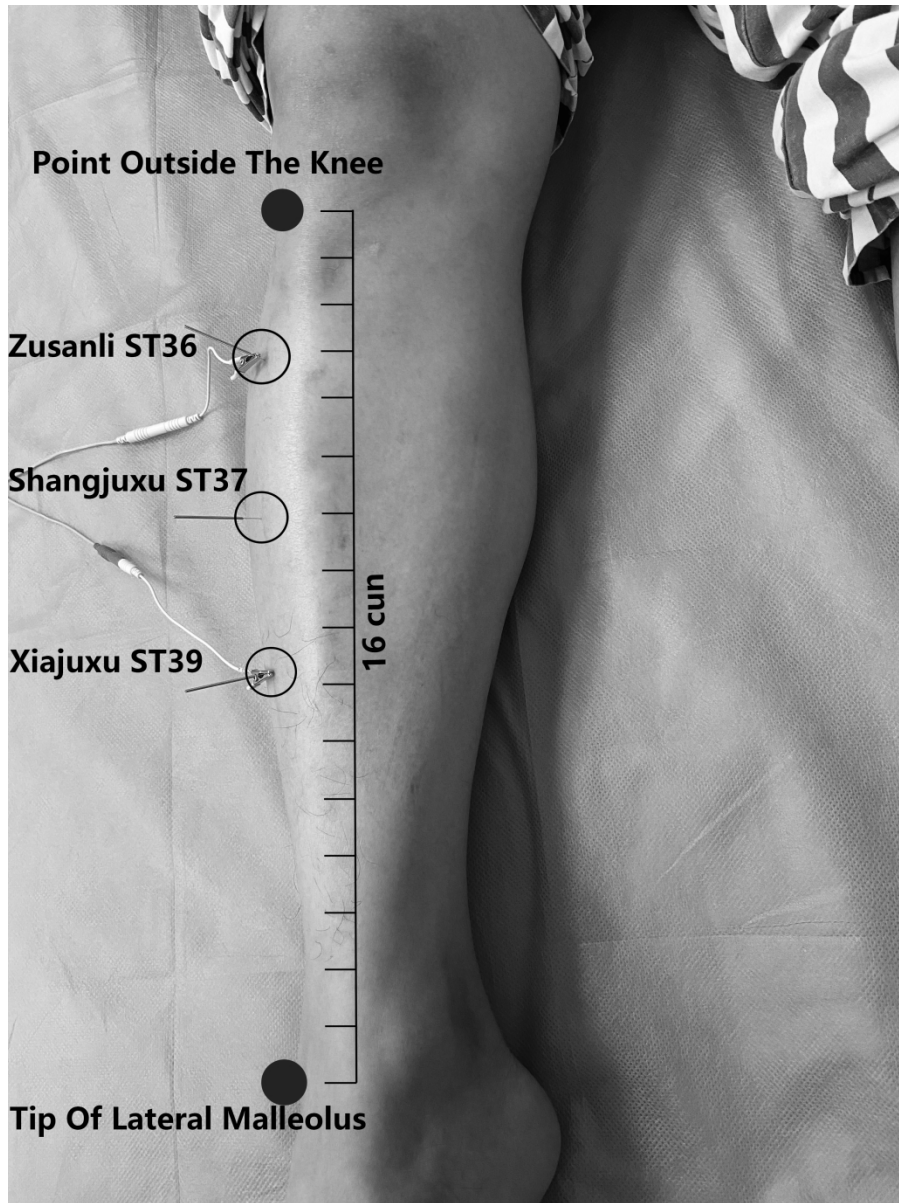

Figure 3b: Location and electrode connection of lower limb acupoints.

1066x1422mm (72 x 72 DPI)

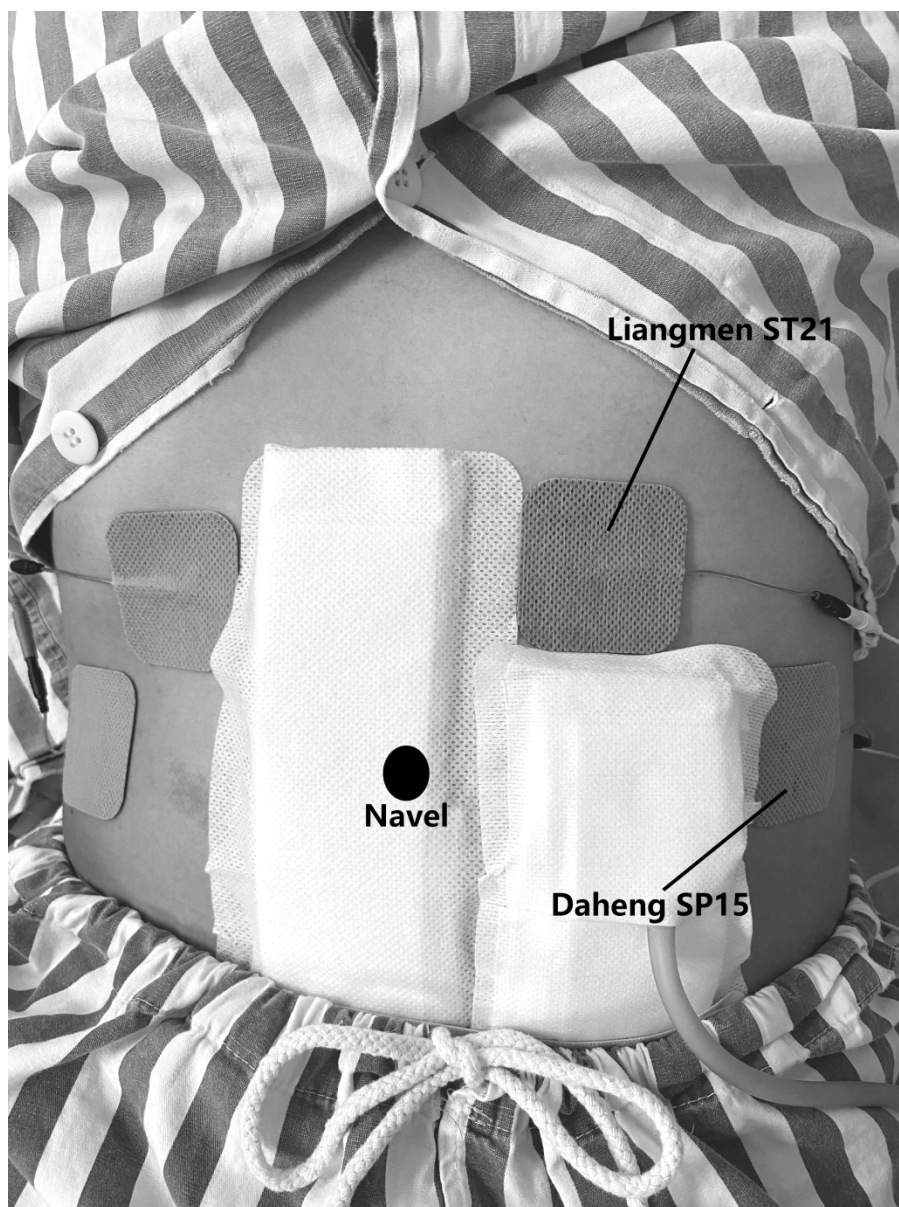

45 Figure 3c: Location and electrode connection of abdominal acupoints.

46 1066x1422mm (72 x 72 DPI)

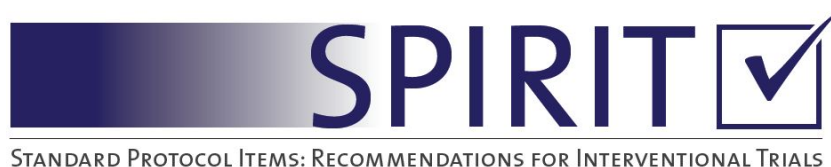

STANDARD PROTOCOL ITEMS: RECOMMENDATIONS FOR INTERVENTIONAL TRIALS

SPIRIT 2013 Checklist: Recommended items to address in a clinical trial protocol and related documents\*

| Section/item                      | Item No | Description                                                                                                                                                                                                                                                                              | Page Number on which item is reported |
|-----------------------------------|---------|------------------------------------------------------------------------------------------------------------------------------------------------------------------------------------------------------------------------------------------------------------------------------------------|---------------------------------------|
| <b>Administrative information</b> |         |                                                                                                                                                                                                                                                                                          |                                       |
| Title                             | 1       | Descriptive title identifying the study design, population, interventions, and, if applicable, trial acronym                                                                                                                                                                             | 1                                     |
| Trial registration                | 2a      | Trial identifier and registry name. If not yet registered, name of intended registry                                                                                                                                                                                                     | 3                                     |
|                                   | 2b      | All items from the World Health Organization Trial Registration Data Set                                                                                                                                                                                                                 | 3                                     |
| Protocol version                  | 3       | Date and version identifier                                                                                                                                                                                                                                                              | 7                                     |
| Funding                           | 4       | Sources and types of financial, material, and other support                                                                                                                                                                                                                              | 16                                    |
| Roles and responsibilities        | 5a      | Names, affiliations, and roles of protocol contributors                                                                                                                                                                                                                                  | 1                                     |
|                                   | 5b      | Name and contact information for the trial sponsor                                                                                                                                                                                                                                       | 1                                     |
|                                   | 5c      | Role of study sponsor and funders, if any, in study design; collection, management, analysis, and interpretation of data; writing of the report; and the decision to submit the report for publication, including whether they will have ultimate authority over any of these activities | 15                                    |

|                                                           |     |                                                                                                                                                                                                                                                                  |      |
|-----------------------------------------------------------|-----|------------------------------------------------------------------------------------------------------------------------------------------------------------------------------------------------------------------------------------------------------------------|------|
|                                                           | 5d  | Composition, roles, and responsibilities of the coordinating centre, steering committee, endpoint adjudication committee, data management team, and other individuals or groups overseeing the trial, if applicable (see Item 21a for data monitoring committee) | N/A  |
| <b>Introduction</b>                                       |     |                                                                                                                                                                                                                                                                  |      |
| Background and rationale                                  | 6a  | Description of research question and justification for undertaking the trial, including summary of relevant studies (published and unpublished) examining benefits and harms for each intervention                                                               | 4-7  |
|                                                           | 6b  | Explanation for choice of comparators                                                                                                                                                                                                                            | 5    |
| Objectives                                                | 7   | Specific objectives or hypotheses                                                                                                                                                                                                                                | 2    |
| Trial design                                              | 8   | Description of trial design including type of trial (eg, parallel group, crossover, factorial, single group), allocation ratio, and framework (eg, superiority, equivalence, noninferiority, exploratory)                                                        | 7    |
| <b>Methods: Participants, interventions, and outcomes</b> |     |                                                                                                                                                                                                                                                                  |      |
| Study setting                                             | 9   | Description of study settings (eg, community clinic, academic hospital) and list of countries where data will be collected. Reference to where list of study sites can be obtained                                                                               | 7    |
| Eligibility criteria                                      | 10  | Inclusion and exclusion criteria for participants. If applicable, eligibility criteria for study centres and individuals who will perform the interventions (eg, surgeons, psychotherapists)                                                                     | 7-8  |
| Interventions                                             | 11a | Interventions for each group with sufficient detail to allow replication, including how and when they will be administered                                                                                                                                       | 9-11 |
|                                                           | 11b | Criteria for discontinuing or modifying allocated interventions for a given trial participant (eg, drug dose change in response to harms, participant request, or improving/worsening disease)                                                                   | 9-11 |

|                                                                     |     |                                                                                                                                                                                                                                                                                                                                                                                |      |
|---------------------------------------------------------------------|-----|--------------------------------------------------------------------------------------------------------------------------------------------------------------------------------------------------------------------------------------------------------------------------------------------------------------------------------------------------------------------------------|------|
|                                                                     | 11c | Strategies to improve adherence to intervention protocols, and any procedures for monitoring adherence (eg, drug tablet return, laboratory tests)                                                                                                                                                                                                                              | 9-11 |
|                                                                     | 11d | Relevant concomitant care and interventions that are permitted or prohibited during the trial                                                                                                                                                                                                                                                                                  | 9-11 |
| Outcomes                                                            | 12  | Primary, secondary, and other outcomes, including the specific measurement variable (eg, systolic blood pressure), analysis metric (eg, change from baseline, final value, time to event), method of aggregation (eg, median, proportion), and time point for each outcome. Explanation of the clinical relevance of chosen efficacy and harm outcomes is strongly recommended | 11   |
| Participant timeline                                                | 13  | Time schedule of enrolment, interventions (including any run-ins and washouts), assessments, and visits for participants. A schematic diagram is highly recommended (see Figure)                                                                                                                                                                                               | 9-11 |
| Sample size                                                         | 14  | Estimated number of participants needed to achieve study objectives and how it was determined, including clinical and statistical assumptions supporting any sample size calculations                                                                                                                                                                                          | 12   |
| Recruitment                                                         | 15  | Strategies for achieving adequate participant enrolment to reach target sample size                                                                                                                                                                                                                                                                                            | 7    |
| <b>Methods: Assignment of interventions (for controlled trials)</b> |     |                                                                                                                                                                                                                                                                                                                                                                                |      |
| Allocation:                                                         |     |                                                                                                                                                                                                                                                                                                                                                                                |      |
| Sequence generation                                                 | 16a | Method of generating the allocation sequence (eg, computer-generated random numbers), and list of any factors for stratification. To reduce predictability of a random sequence, details of any planned restriction (eg, blocking) should be provided in a separate document that is unavailable to those who enrol participants or assign interventions                       | 8-9  |

|                                                           |     |                                                                                                                                                                                                                                                                                                                                                                                                              |     |
|-----------------------------------------------------------|-----|--------------------------------------------------------------------------------------------------------------------------------------------------------------------------------------------------------------------------------------------------------------------------------------------------------------------------------------------------------------------------------------------------------------|-----|
| Allocation concealment mechanism                          | 16b | Mechanism of implementing the allocation sequence (eg, central telephone; sequentially numbered, opaque, sealed envelopes), describing any steps to conceal the sequence until interventions are assigned                                                                                                                                                                                                    | 8-9 |
| Implementation                                            | 16c | Who will generate the allocation sequence, who will enrol participants, and who will assign participants to interventions                                                                                                                                                                                                                                                                                    | 8-9 |
| Blinding (masking)                                        | 17a | Who will be blinded after assignment to interventions (eg, trial participants, care providers, outcome assessors, data analysts), and how                                                                                                                                                                                                                                                                    | 8-9 |
|                                                           | 17b | If blinded, circumstances under which unblinding is permissible, and procedure for revealing a participant's allocated intervention during the trial                                                                                                                                                                                                                                                         | 8-9 |
| <b>Methods: Data collection, management, and analysis</b> |     |                                                                                                                                                                                                                                                                                                                                                                                                              |     |
| Data collection methods                                   | 18a | Plans for assessment and collection of outcome, baseline, and other trial data, including any related processes to promote data quality (eg, duplicate measurements, training of assessors) and a description of study instruments (eg, questionnaires, laboratory tests) along with their reliability and validity, if known. Reference to where data collection forms can be found, if not in the protocol | 11  |
|                                                           | 18b | Plans to promote participant retention and complete follow-up, including list of any outcome data to be collected for participants who discontinue or deviate from intervention protocols                                                                                                                                                                                                                    | 11  |
| Data management                                           | 19  | Plans for data entry, coding, security, and storage, including any related processes to promote data quality (eg, double data entry; range checks for data values). Reference to where details of data management procedures can be found, if not in the protocol                                                                                                                                            | 15  |

|    |                                 |     |                                                                                                                                                                                                                                                                                                                                       |       |
|----|---------------------------------|-----|---------------------------------------------------------------------------------------------------------------------------------------------------------------------------------------------------------------------------------------------------------------------------------------------------------------------------------------|-------|
| 1  | Statistical methods             | 20a | Statistical methods for analysing primary and secondary outcomes. Reference to where other details of the statistical analysis plan can be found, if not in the protocol                                                                                                                                                              | 13    |
| 2  |                                 | 20b | Methods for any additional analyses (eg, subgroup and adjusted analyses)                                                                                                                                                                                                                                                              | 13    |
| 3  |                                 | 20c | Definition of analysis population relating to protocol non-adherence (eg, as randomised analysis), and any statistical methods to handle missing data (eg, multiple imputation)                                                                                                                                                       | 13    |
| 4  | <b>Methods: Monitoring</b>      |     |                                                                                                                                                                                                                                                                                                                                       |       |
| 5  | Data monitoring                 | 21a | Composition of data monitoring committee (DMC); summary of its role and reporting structure; statement of whether it is independent from the sponsor and competing interests; and reference to where further details about its charter can be found, if not in the protocol. Alternatively, an explanation of why a DMC is not needed | N/A   |
| 6  |                                 | 21b | Description of any interim analyses and stopping guidelines, including who will have access to these interim results and make the final decision to terminate the trial                                                                                                                                                               | N/A   |
| 7  | Harms                           | 22  | Plans for collecting, assessing, reporting, and managing solicited and spontaneously reported adverse events and other unintended effects of trial interventions or trial conduct                                                                                                                                                     | 11-12 |
| 8  | Auditing                        | 23  | Frequency and procedures for auditing trial conduct, if any, and whether the process will be independent from investigators and the sponsor                                                                                                                                                                                           | N/A   |
| 9  | <b>Ethics and dissemination</b> |     |                                                                                                                                                                                                                                                                                                                                       |       |
| 10 | Research ethics approval        | 24  | Plans for seeking research ethics committee/institutional review board (REC/IRB) approval                                                                                                                                                                                                                                             | 15    |

|                               |     |                                                                                                                                                                                                                                                                                     |     |
|-------------------------------|-----|-------------------------------------------------------------------------------------------------------------------------------------------------------------------------------------------------------------------------------------------------------------------------------------|-----|
| Protocol amendments           | 25  | Plans for communicating important protocol modifications (eg, changes to eligibility criteria, outcomes, analyses) to relevant parties (eg, investigators, REC/IRBs, trial participants, trial registries, journals, regulators)                                                    | N/A |
| Consent or assent             | 26a | Who will obtain informed consent or assent from potential trial participants or authorised surrogates, and how (see Item 32)                                                                                                                                                        | 7-8 |
|                               | 26b | Additional consent provisions for collection and use of participant data and biological specimens in ancillary studies, if applicable                                                                                                                                               | N/A |
| Confidentiality               | 27  | How personal information about potential and enrolled participants will be collected, shared, and maintained in order to protect confidentiality before, during, and after the trial                                                                                                | 15  |
| Declaration of interests      | 28  | Financial and other competing interests for principal investigators for the overall trial and each study site                                                                                                                                                                       | 16  |
| Access to data                | 29  | Statement of who will have access to the final trial dataset, and disclosure of contractual agreements that limit such access for investigators                                                                                                                                     | 15  |
| Ancillary and post-trial care | 30  | Provisions, if any, for ancillary and post-trial care, and for compensation to those who suffer harm from trial participation                                                                                                                                                       | 13  |
| Dissemination policy          | 31a | Plans for investigators and sponsor to communicate trial results to participants, healthcare professionals, the public, and other relevant groups (eg, via publication, reporting in results databases, or other data sharing arrangements), including any publication restrictions | 15  |
|                               | 31b | Authorship eligibility guidelines and any intended use of professional writers                                                                                                                                                                                                      | 15  |
|                               | 31c | Plans, if any, for granting public access to the full protocol, participant-level dataset, and statistical code                                                                                                                                                                     | 15  |



|                            |    |                                                                                                                                                                                                |     |
|----------------------------|----|------------------------------------------------------------------------------------------------------------------------------------------------------------------------------------------------|-----|
| <b>Appendices</b>          |    |                                                                                                                                                                                                |     |
| Informed consent materials | 32 | Model consent form and other related documentation given to participants and authorised surrogates                                                                                             | N/A |
| Biological specimens       | 33 | Plans for collection, laboratory evaluation, and storage of biological specimens for genetic or molecular analysis in the current trial and for future use in ancillary studies, if applicable | N/A |

\*It is strongly recommended that this checklist be read in conjunction with the SPIRIT 2013 Explanation & Elaboration for important clarification on the items. Amendments to the protocol should be tracked and dated. The SPIRIT checklist is copyrighted by the SPIRIT Group under the Creative Commons "[Attribution-NonCommercial-NoDerivs 3.0 Unported](https://creativecommons.org/licenses/by-nc-nd/3.0/)" license.

# BMJ Open

## Transcutaneous electrical acupoint stimulation combined with electroacupuncture for rapid recovery of patients after laparotomy for gastrointestinal surgery: A study protocol for a randomized controlled trial

|                                 |                                                                                                                                                                                                                                                                                                                                                                                                                                                                                                                                                                                                                                                                                                                                                                                                                                                          |
|---------------------------------|----------------------------------------------------------------------------------------------------------------------------------------------------------------------------------------------------------------------------------------------------------------------------------------------------------------------------------------------------------------------------------------------------------------------------------------------------------------------------------------------------------------------------------------------------------------------------------------------------------------------------------------------------------------------------------------------------------------------------------------------------------------------------------------------------------------------------------------------------------|
| Journal:                        | <i>BMJ Open</i>                                                                                                                                                                                                                                                                                                                                                                                                                                                                                                                                                                                                                                                                                                                                                                                                                                          |
| Manuscript ID                   | bmjopen-2021-053309.R1                                                                                                                                                                                                                                                                                                                                                                                                                                                                                                                                                                                                                                                                                                                                                                                                                                   |
| Article Type:                   | Protocol                                                                                                                                                                                                                                                                                                                                                                                                                                                                                                                                                                                                                                                                                                                                                                                                                                                 |
| Date Submitted by the Author:   | 18-Sep-2021                                                                                                                                                                                                                                                                                                                                                                                                                                                                                                                                                                                                                                                                                                                                                                                                                                              |
| Complete List of Authors:       | Li, Hao; Sichuan University West China Hospital, Integrated Traditional and Western Medicine Department<br>Wen, Qian; Sichuan University West China Hospital, Integrated Traditional and Western Medicine Department<br>Lu, Lingyun; Sichuan University West China Hospital, Department of Integrated Traditional Chinese and Western Medicine<br>Hu, Hangqi; Sichuan University West China Hospital, Integrated Traditional and Western Medicine Department<br>He, Ying; Sichuan University West China Hospital, Integrated Traditional and Western Medicine Department<br>Zhou, Yaming; Sichuan University West China Hospital, Gastrointestinal Surgery<br>Wu, Xiaoting; Sichuan University West China Hospital, Gastrointestinal Surgery<br>Li, Ning; Sichuan University West China Hospital, Integrated Traditional and Western Medicine Department |
| <b>Primary Subject Heading</b>: | Complementary medicine                                                                                                                                                                                                                                                                                                                                                                                                                                                                                                                                                                                                                                                                                                                                                                                                                                   |
| Secondary Subject Heading:      | Complementary medicine, Gastroenterology and hepatology                                                                                                                                                                                                                                                                                                                                                                                                                                                                                                                                                                                                                                                                                                                                                                                                  |
| Keywords:                       | COMPLEMENTARY MEDICINE, PAIN MANAGEMENT, GASTROENTEROLOGY                                                                                                                                                                                                                                                                                                                                                                                                                                                                                                                                                                                                                                                                                                                                                                                                |
|                                 |                                                                                                                                                                                                                                                                                                                                                                                                                                                                                                                                                                                                                                                                                                                                                                                                                                                          |

SCHOLARONE™  
Manuscripts



I, the Submitting Author has the right to grant and does grant on behalf of all authors of the Work (as defined in the below author licence), an exclusive licence and/or a non-exclusive licence for contributions from authors who are: i) UK Crown employees; ii) where BMJ has agreed a CC-BY licence shall apply, and/or iii) in accordance with the terms applicable for US Federal Government officers or employees acting as part of their official duties; on a worldwide, perpetual, irrevocable, royalty-free basis to BMJ Publishing Group Ltd ("BMJ") its licensees and where the relevant Journal is co-owned by BMJ to the co-owners of the Journal, to publish the Work in this journal and any other BMJ products and to exploit all rights, as set out in our [licence](#).

The Submitting Author accepts and understands that any supply made under these terms is made by BMJ to the Submitting Author unless you are acting as an employee on behalf of your employer or a postgraduate student of an affiliated institution which is paying any applicable article publishing charge ("APC") for Open Access articles. Where the Submitting Author wishes to make the Work available on an Open Access basis (and intends to pay the relevant APC), the terms of reuse of such Open Access shall be governed by a Creative Commons licence – details of these licences and which [Creative Commons](#) licence will apply to this Work are set out in our licence referred to above.

Other than as permitted in any relevant BMJ Author's Self Archiving Policies, I confirm this Work has not been accepted for publication elsewhere, is not being considered for publication elsewhere and does not duplicate material already published. I confirm all authors consent to publication of this Work and authorise the granting of this licence.

1  
2  
3  
4 **Transcutaneous electrical acupoint stimulation combined with electroacupuncture for rapid**  
5  
6 **recovery of patients after laparotomy for gastrointestinal surgery: A study protocol for a**  
7  
8 **randomized controlled trial**  
9  
10

11  
12  
13  
14 Hao Li<sup>1#</sup>, Qian Wen<sup>1#</sup>, Lingyun Lu<sup>1</sup>, Hangqi Hu<sup>1</sup>, Ying He<sup>1</sup>, Yaming Zhou<sup>2</sup>, Xiaoting Wu<sup>2\*</sup>, Ning  
15  
16  
17 Li<sup>1\*</sup>  
18  
19  
20  
21

22 # Hao Li and Qian Wen contributed equally to this work.  
23  
24

25 **\* Correspondence authors:**  
26

27 Dr. Xiaoting Wu, [wxt1@medmail.com.cn](mailto:wxt1@medmail.com.cn)  
28  
29

30 Dr. Ning Li, [zhenjiuhuaxi@163.com](mailto:zhenjiuhuaxi@163.com)  
31

32 1. Department of Integrated Traditional and Western Medicine, West China Hospital of Sichuan  
33  
34 University, Chengdu, China  
35  
36

37 2. Department of Gastrointestinal Surgery, West China Hospital of Sichuan University, Chengdu,  
38  
39  
40 China  
41  
42  
43  
44  
45  
46  
47  
48  
49  
50  
51  
52  
53  
54  
55  
56  
57  
58  
59  
60

## ABSTRACT

**Introduction:** Abdominal surgery is associated with common complications, including decreased or poor appetite, abdominal distension, abdominal pain caused by decreased or absent gastrointestinal motility, anal arrest with flatus and defecation, and nausea and vomiting resulting from the use of anaesthetics and opioid analgesics. These complications seriously affect postoperative recovery, prolong hospital stay, and aggravate patient burden. This study aims to investigate for the first time the efficacy of transcutaneous electrical acupoint stimulation (TEAS) combined with electroacupuncture (EA) therapy for rapid recovery after laparotomy for gastrointestinal surgery. There have been no clinical studies of this combination therapy.

**Methods and analysis:** This will be a prospective, single-centre, three-arm, randomised controlled trial. A total of 480 patients undergoing abdominal surgery will be stratified according to surgery type (i.e. gastric or colorectal procedure) and randomised into three groups; namely, the EA, TEAS+EA, and control groups. The control group will receive enhanced recovery after surgery (ERAS)-standardised perioperative management, including preoperative education, optimising the anaesthesia scheme, avoiding intraoperative hypothermia, restrictive fluid infusion, and reducing surgical trauma. The EA group will receive electroacupuncture stimulation at LI4, PC6, ST36, ST37, and ST39 based on the ERAS-standardised perioperative management. Moreover, the TEAS+EA group will receive ERAS-standardised perioperative management; electroacupuncture stimulation at the LI4, PC6, ST36, ST37, and ST39;

1  
2  
3  
4 and TEAS stimulation at ST21 and SP15. The primary outcome will be the GI-2  
5  
6 (composite outcome of time to first defaecation and time to tolerance of a solid diet).  
7

8  
9 Secondary outcomes will include the time of first passage of flatus, time to first  
10  
11 defaecation , time to tolerance of a solid diet, time to first ambulation, hospital duration  
12  
13 from operation to discharge, pain and nausea vomiting scores on the VAS, medication  
14  
15 use, incidence of postoperative complications, and evaluation of treatment modality  
16  
17 acceptability. All statistical analyses will be performed based on the intention-to-treat  
18  
19 principle.  
20  
21  
22  
23

24  
25 **Ethics and dissemination** Ethics approval has been granted by the Ethics Committee  
26  
27 on Biomedical Research, West China Hospital of Sichuan University (approval number:  
28  
29 2021; number 52). The results are expected to be published in peer-reviewed journals.  
30  
31

32  
33  
34 **Trial registration number:** ChiCTR2100045646 (Chinese Clinical Trial Registry)  
35  
36

### 37 **Strengths and limitations of this study**

38  
39

- 40 • A randomised controlled trial of 480 patients will be conducted to evaluate the  
41 efficacy of TEAS combined with EA therapy for rapid recovery after  
42 laparotomy for gastrointestinal surgery.  
43  
44
- 45 • The trial feasibility has been examined in a pilot randomised trial of 120 patients,  
46 included 60 patients with laparotomy stomach tumor resection and 60 patients  
47 with laparotomy colon tumor resection.  
48  
49
- 50 • This trial will be conducted using rigorous methods; for example, the patients  
51 will be randomly assigned to three groups; the data will undergo blind statistical  
52  
53  
54  
55  
56  
57  
58  
59  
60

1  
2  
3  
4 analysis; and the interventionists, efficacy evaluators, and statisticians will be  
5  
6 separated.

- 7  
8  
9
- 10 • This trial did not include a sham control arm, the analysis of the placebo  
11 response or effect was lacking.  
12  
13  
14

## 15 16 **INTRODUCTION**

17  
18 The most common postoperative complications in laparotomy for gastrointestinal surgery include  
19 gastrointestinal dysfunction, pain, postoperative nausea and vomiting (PONV), etc. These result  
20 from numerous factors, including the intraoperative use of anaesthetic drugs, surgical trauma,  
21 peritoneal irritation or inflammatory response, and postoperative use of analgesic drugs<sup>1-3</sup>. Rapid  
22 postoperative rehabilitation can prevent or reduce intraperitoneal adhesion; reduce the incidence of  
23 complications, including intestinal obstruction and intestinal infection; prevent secondary surgery,  
24 reduce opioid usage, and alleviate pain. Moreover, it can promote prompt recovery of the patients'  
25 oral diet, reduce the use of parenteral nutrition, shorten the hospitalisation duration, and reduce  
26 hospitalisation costs<sup>4-8</sup>.  
27  
28  
29  
30  
31  
32  
33  
34  
35  
36  
37  
38  
39  
40

41  
42 Enhanced recovery after surgery (ERAS) is based on evidence-based medicine and is a  
43 standardised, collaborative, and multidisciplinary optimisation management protocol for the  
44 perioperative period. It allows a reduction in the physiological and psychological traumatic stress  
45 response, as well as postoperative complications; a faster postoperative recovery; a shorter  
46 postoperative hospitalisation time; and a reduction in patient costs<sup>9</sup>. This concept was initially  
47 proposed by the Danish Medical Scientist Kehlet in 1997<sup>10</sup>. After > 20 years of practice and  
48 optimisation, the ERAS concept and pathway have been popularised and rapidly applied  
49  
50  
51  
52  
53  
54  
55  
56  
57  
58  
59  
60

1  
2  
3  
4 worldwide<sup>11</sup>. Although a series of perioperative ERAS measures can accelerate recovery, there  
5  
6 remains room for improvement in the prevention and treatment of postoperative gastrointestinal  
7  
8 dysfunction and PONV, as well as in the reduction of opioid use<sup>12</sup>.

9  
10  
11 Acupuncture exerts therapeutic effects by regulating gastrointestinal dynamics, analgesia, and  
12  
13 antiemetics. It is widely considered that a degree of postoperative gastrointestinal dysfunction is an  
14  
15 inevitable normal physiological response after abdominal surgery<sup>13</sup>. Several studies have  
16  
17 demonstrated that acupuncture can significantly relieve postoperative abdominal pain and  
18  
19 distension, promote intestinal ventilation, and promptly restore the patient's diet<sup>14 15</sup>. Acupuncture  
20  
21 can enhance gastric dilatation through the sympathetic nerve to promote gastric emptying<sup>16 17</sup>;  
22  
23 moreover, the vasoactive intestinal peptide is involved in electroacupuncture-mediated gastric  
24  
25 motility regulation.  
26  
27  
28  
29  
30

31  
32 Studies have shown that Zusanli (ST36), Shangjuxu (ST37), and Xiajuxu (ST39) stimulation  
33  
34 can effectively improve gastrointestinal transit by reducing local inflammation of the intestinal  
35  
36 musculature<sup>18</sup>. Hegu(LI4) is a pair of acupoints belonging to the Large Intestinal meridian,  
37  
38 Daheng(SP15) is a pair of acupoints belonging to the Spleen meridian, Liangmen(ST21) is a pair of  
39  
40 acupoints belonging to the Stomach meridian. They have the effect of assisting gastrointestinal  
41  
42 function recovery, so they are also commonly used in clinical practice<sup>19-21</sup>.  
43  
44  
45  
46  
47

48 Additionally, acupuncture can facilitate postoperative multimodal analgesia. Postoperative  
49  
50 analgesia is among the core ERAS components. Its principles include sufficient analgesia and  
51  
52 minimisation of opioid usage. Adequate postoperative analgesia can reduce excessive stress, help  
53  
54 patients get out of bed quickly, and promote recovery. Opioids, which are the main traditional  
55  
56 postoperative analgesic drugs, can easily cause postoperative nausea, vomiting, and other  
57  
58  
59  
60



1  
2  
3  
4 complications. Reducing opioid usage allows early recovery of patients. There have been numerous  
5  
6 studies on the mechanisms underlying acupuncture analgesia from the perspectives of  
7  
8 electrophysiology, neurochemistry, molecular biology, and brain imaging<sup>22-24</sup>. Moreover, numerous  
9  
10 clinical studies have shown that acupuncture can significantly reduce postoperative pain and opioid  
11  
12 use after total hip replacement, craniotomy, abdominal surgery, and kidney stone surgery<sup>25-28</sup>.  
13  
14 Therefore, based on the ERAS clinical pathway, acupuncture analgesia may better control wound  
15  
16 pain and reduce the use of analgesics, including opioids, and therefore accelerate patient recovery<sup>29</sup>.  
17  
18  
19  
20  
21

22 PONV is a common complication after surgical anaesthesia and analgesia with opioids that  
23  
24 can cause dehydration, electrolyte imbalance, wound cracking, and discharge delay. PONV is  
25  
26 another important factor that affects the recovery of patients<sup>30</sup>. Studies have shown that Neiguan  
27  
28 (PC6) stimulation can effectively prevent PONV<sup>31,32</sup>. Transcutaneous electrical acupoint  
29  
30 stimulation (TEAS) is more effective than intravenous ondansetron; additionally, using TEAS  
31  
32 combined with drugs can enhance the anti-emetic effects of ondansetron<sup>33</sup>.  
33  
34  
35  
36  
37

38 Numerous studies have supported the application of acupuncture in postoperative rehabilitation;  
39  
40 however, there are differences in efficacy across different acupuncture schemes. Currently, EA is  
41  
42 the most common acupuncture scheme for rapid postoperative rehabilitation, with TEAS being the  
43  
44 second most common scheme. Although TEAS avoids pain resulting from acupuncture needles, its  
45  
46 efficacy is slightly worse than that of EA and it has relatively limited clinical application<sup>34</sup>. However,  
47  
48 our previous clinical experience and preliminary trials suggested that combining TEAS with EA  
49  
50 may have a better curative effect than the conventional electroacupuncture treatment<sup>35-37</sup>. Moreover,  
51  
52 this combination could provide an improved acupuncture treatment protocol for rapid rehabilitation  
53  
54 after laparotomy for gastrointestinal surgery. It may promote the recovery of gastrointestinal  
55  
56  
57  
58  
59  
60

1  
2  
3  
4 function more quickly, reduce pain more obviously, shorten the duration of postoperative hospital  
5  
6 stay, and reduce patient hospitalization costs, etc.  
7

8  
9 Therefore, this prospective, single-centre, three-arm, single-blind, randomised controlled trial  
10  
11 (RCT) aims to evaluate the efficacy of TEAS combined with EA therapy for rapid recovery after  
12  
13 laparotomy for gastrointestinal surgery.  
14  
15

## 16 17 18 **METHODS AND ANALYSIS**

### 19 20 21 **Design**

22  
23 This will be a single-centre, prospective RCT with a three-arm parallel grouping design. The trial  
24  
25 protocol version number: 2.0, date 31th March,2021. The study will be conducted at the West China  
26  
27 Hospital of Sichuan University (WCHSU) from April 2021 to March 2023. All the participants will  
28  
29 be required to provide written informed consent in accordance with the most recent version of the  
30  
31 Declaration of Helsinki. Figure 1 presents the study flowchart.  
32  
33  
34  
35  
36  
37  
38  
39  
40  
41

### 42 43 **Patient population and setting**

44  
45 A total of 480 Chinese patients undergoing laparotomy for gastrointestinal surgery will be  
46  
47 sequentially enrolled at the WCHSU after fulfilling the eligibility criteria and signing informed  
48  
49 consent. A clinical assistant with institutional review board training will be in charge of patient  
50  
51 enrolment.  
52  
53

### 54 55 **Eligibility criteria**

56  
57 *The inclusion criteria will be as follows:* (1) male and female patients aged 18–70 years; (2)  
58  
59 laparotomy tumour resection under general anaesthesia (stomach, colon, and rectum); and (3)  
60

1  
2  
3  
4 volunteering to participate in this study and signing an informed consent form.  
5

6 *The exclusion criteria will be as follows:* (1) surgical incision or scar on the meridian of  
7  
8  
9 ST21/SP15, (2) local skin infection at acupoints, (3) inability to complete the visual analogue scale  
10  
11 (VAS), and (4) allergy to metal or severe needle fear, intolerance of TEAS or EA treatment, (5)  
12  
13 uncontrolled diabetes, severe cardiac, central nervous, psychiatric disorders, or coagulopathy; (6)  
14  
15 cardiac pacemaker; and (7) participation in other clinical trials.  
16  
17

18  
19 *Withdrawal criteria:* Participants meeting any of the following criteria will be withdrawn from  
20  
21 the study: (1) occurrence of serious adverse events; (2) participants with serious complications or  
22  
23 other serious diseases requiring emergency measures, (3) being required to withdraw during the test,  
24  
25 and (4) violation of the test program. Withdrawn patients will not be replaced.  
26  
27  
28  
29  
30  
31

### 32 **Randomisation and blinding**

33  
34 This study will have a single-blind design. The patient will be blinded to the group allocation;  
35  
36 moreover, patients in the same ward will be separated by a bed curtain when receiving acupuncture  
37  
38 treatment, with only the research leader and acupuncturist being aware of the treatment allocation.  
39  
40  
41 The randomised grouping plan will be designed using SPSS 22.0. According to the plan, 480  
42  
43 patients will be randomly divided into three groups according to a ratio of 1:1:1: EA, TEAS+EA,  
44  
45 and control groups. The group scheme will be kept in a confidential envelope; further, the research  
46  
47 leader will randomly distribute the included patients to each group following the distribution plan  
48  
49 in the envelope. Additionally, the research leader will only inform the acupuncturist responsible for  
50  
51 the operation. Efficacy evaluation will be conducted blinded to the grouping allocation. Blind  
52  
53 statistical analysis will be used in the data summary stage. Operators, efficacy evaluators, and  
54  
55  
56  
57  
58  
59  
60

1  
2  
3  
4 statisticians will be separated.  
5  
6  
7

## 8 9 **INTERVENTION**

10  
11 All acupoints will be determined based on the National Standard of Nomenclature and Location of  
12  
13 Acupuncture Points (GB/T 12346-2006)<sup>38</sup>. All practitioners performing the treatment must have an  
14  
15 acupuncturist qualification certificate with independent clinical experience for > 2 years. The  
16  
17 acupuncturist qualification certificate with independent clinical experience for > 2 years. The  
18  
19 acupuncturists will not be replaced during the experiments.  
20  
21

22 All patients will receive standardised perioperative management by ERAS, including  
23  
24 preoperative education, optimisation of anaesthesia scheme, avoidance of intraoperative  
25  
26 hypothermia, restrictive fluid infusion, and reduction of surgical trauma. Regarding the electronic  
27  
28 acupuncture treatment instrument (Hwato, SDZ-V, Suzhou Medical Supplies Factory Co., Ltd), the  
29  
30 current frequency will be continuous wave 2 Hz, the current intensity will be measured in degrees  
31  
32 as tolerated by the patient; moreover, the treatment duration will last 30 min (Figure 2). The  
33  
34 treatment will be initiated from the first postoperative day, once daily in the morning, until the  
35  
36 patient regains defecation and could tolerate transoral solid food.  
37  
38  
39  
40  
41

42  
43 In the EA group (electroacupuncture is added at the base of basic treatment), treatment will be  
44  
45 bilaterally performed at five acupoint pairs: Hegu (LI4), Neiguan (PC6), Zusanli (ST36), Shangjuxu  
46  
47 (ST37), and Xiajuxu (ST39). LI4 is an acupoint of the large intestine meridian and is located on the  
48  
49 dorsum of the hand between the first and second metacarpal bones. PC6 belongs to the pericardium  
50  
51 meridian and is located between the flexor carpi radialis muscle tendon and the palmaris longus  
52  
53 tendon, 2 Cun above the wrist crease. ST36, ST37, and ST39 are acupoints of the stomach meridian.  
54  
55  
56  
57  
58 ST36 is located on the lateral side of the lower leg, 3 Cun below the lateral border of the knee and  
59  
60

1  
2  
3  
4 one finger width lateral to the anterior border of the tibia. ST37 is located 3 Cun below ST36. ST39  
5  
6 is located 3 Cun below ST37. After skin disinfection with a disposable disinfecting cotton swab,  
7  
8 sterile and disposable stainless steel needles (0.25×40 mm, Suzhou Jiajian, Jiangsu, China) will be  
9  
10 quickly and perpendicularly inserted into the skin acupoints at a depth of 25–30 mm. The duration  
11  
12 of reinforcing-reducing manipulation of twirling and rotating needles should be used for 1 min to  
13  
14 achieve de qi (a composite of sensations including soreness, numbness, distention, heaviness, and  
15  
16 other sensations), which significantly contributes to acupuncture efficacy. The ipsilateral Neiguan,  
17  
18 Hegu, Zusanli, and Xiajuxu will be separately connected to one electrode set, and therefore yielding  
19  
20 four electrode sets (Figure 3 a, b).  
21  
22  
23  
24  
25  
26

27 For the TEAS+EA group, treatment will be based on the EA group with the addition of two  
28  
29 pairs of bilateral abdominal acupoints: Liangmen (ST21) and Daheng (SP15). Additionally, ST21  
30  
31 is an acupoint of the stomach meridian that is located 4 Cun above the umbilicus and 2 Cun open  
32  
33 next to the anterior median line. SP15 is an acupoint of the spleen meridian, located 4 Cun beside  
34  
35 the umbilicus and lateral to the rectus abdominis muscle. Abdominal acupoints will be stimulated  
36  
37 using a self-adhesive electrode pad with electrical conductivity; additionally, the ipsilateral  
38  
39 Liangmen will be connected to the Daheng set of electrodes. The ipsilateral Neiguan, Hegu, Zusanli,  
40  
41 and Xiajuxu acupoints will be connected to one electrode set to yield a total of six sets of electrodes  
42  
43 (Figure 3 a, b, c).  
44  
45  
46  
47  
48  
49

50 The control group will receive ERAS-standardised perioperative management without  
51  
52 acupuncture treatment.  
53  
54  
55  
56  
57

## 58 **OUTCOME MEASURES**

59  
60

### **Main outcome**

The primary outcome will be the GI-2 (composite outcome of time to first defaecation and time to tolerance of a solid diet). Participants will be visited and evaluated by efficacy evaluators at the end of each treatment.

### **Secondary outcome**

The secondary outcomes include the time of first passage of flatus, time to first defaecation, time to tolerance of a solid diet, time to first ambulation, hospital duration from operation to discharge, pain and nausea vomiting scores on the VAS (from 0 [no at all] to 10 [the worst]), medication use (name, frequency and dosage of analgesic drugs and antiemetic agents), incidence of postoperative complications (include intra-abdominal infection, intestinal ischemia and necrosis, anastomotic leak, pulmonary infection, etc), and evaluation of treatment modality acceptability (classified into five grades: very acceptable, moderately acceptable, somewhat acceptable, moderately unacceptable, and totally unacceptable). Participants will be visited and evaluated by efficacy evaluators at the end of each treatment.

We add GI-2 as a primary outcome to the original protocol after recruitment of the study had already begun. GI-2 is a time indicator, which will be calculated from two existing outcomes (time to first defaecation and time to tolerance of oral diet). There will be no harm to subjects, no additional cost and no more work.

### **Safety evaluation**

All adverse events will be recorded on the adverse event record sheet by the acupuncturist and participants at any time during the study period. Adverse events to be recorded include fainting during acupuncture treatment, needle breaking, unbearable acupuncture pain, local hematoma,

1  
2  
3  
4 infection, and any other discomfort or accident. The intensity and causality of each adverse event  
5  
6 will be evaluated and recorded. If any serious adverse events occur due to an intervention, the  
7  
8 intervention will be immediately stopped; further, appropriate corrective action will be taken.  
9  
10 Serious adverse events will be promptly reported to the institutional review board within 24 h until  
11  
12  
13  
14 30 days after the end of the trial.

### 17 **Sample size calculation**

18  
19 The stratification factors will be gastrectomy and colorectal resection, with each layer being divided  
20  
21 into three groups: the group ratio will be 1:1:1. The main efficacy indicator will be the GI-2  
22  
23 (composite outcome of time to first postoperativedefaecation and time to tolerance of a solid diet).  
24  
25 Given the lack of reports on TEAS+EA for promoting postoperative recovery, we conducted a  
26  
27 preliminary experiment. The preliminary experimental results indicated that the GI-2 of laparotomy  
28  
29 gastrectomy surgery in the control, EA, and TEAS+EA groups was  $113.1 \pm 37.5$  h,  $86.9 \pm 36.1$  h,  
30  
31 and  $80.1 \pm 33.2$  h, respectively, Additionally, in the control group, the GI-2 of laparotomy colorectal  
32  
33 surgery in the control, EA, and TEAS+EA groups was  $106.2 \pm 35.9$  h,  $85.6 \pm 33.1$  h, and  $78.5 \pm$   
34  
35  $36.3$  h, respectively. The sample size was determined using PASS 11 with  $\alpha = 0.05$  (two-sided) and  
36  
37  $\beta = 0.1$  (90% power). The required sample size will be 60 patients per group. Assuming that 20%  
38  
39 of patients will be lost to follow-up, we chose a sample size of 80 participants for each group, with  
40  
41 a total sample size of 480 participants.  
42  
43  
44  
45  
46  
47  
48  
49

### 51 **Statistical analysis**

52  
53 Statistical analysis will be conducted by independent third-party professional statisticians. All data  
54  
55 will be collected by efficacy evaluators. Data analysis will be performed using the intention  
56  
57 processing principle in SPSS 22.0. Statistical results will be reported using a two-sided test, with  
58  
59  
60

1  
2  
3  
4 statistical significance being set at P-value < 0.05. Continuous variables will be expressed as: mean  
5  
6 (SD), median (interquartile range (IQR)), or minimum and maximum. For comparisons between  
7  
8 treatment groups, analyses of variance (ANOVAs) will be used for normally distributed variables,  
9  
10 and the Kruskal–Wallis H test will be used for non-normally distributed variables. Categorical  
11  
12 variables will be expressed as numbers (%), and will be analyzed via chi-square tests for between-  
13  
14 group comparisons.  
15  
16  
17  
18

### 19 **Patient and public involvement**

20  
21 Patients and/or the public were not involved in study design or conduct of the study. The present  
22  
23 trial was developed by acupuncturists based on previous clinical experience and literature. The  
24  
25 expected outcomes are commonly used to assess rapid postoperative recovery in clinical practice.  
26  
27  
28 The cost of interventions and outcome measurements will be maintained using the study funding;  
29  
30 therefore, it was not considered a significant burden and met the patient preferences. The results  
31  
32 will be disseminated to the participants via the WCHSU website.  
33  
34  
35  
36  
37  
38  
39  
40  
41  
42

### 43 **DISCUSSION**

44  
45 Several studies have demonstrated the efficacy of acupuncture in rapid postoperative  
46  
47 rehabilitation<sup>39</sup>. Previous clinical experience and studies have shown that acupuncture  
48  
49 on the distal limb acupoints is mostly selected for rehabilitation after abdominal surgery,  
50  
51 which may be associated with several factors, including the presence of surgical  
52  
53 wounds after abdominal surgery, postoperative changes in the structure and state of  
54  
55 abdominal organs affecting acupuncture needle manipulation, and safety. However,  
56  
57  
58  
59  
60



1  
2  
3  
4 recent studies have shown that abdominal and limb acupoints facilitate improvement of  
5  
6 abdominal pain and the distension degree; moreover, abdominal acupoints have a more  
7  
8 optimal effect on improving the degree of abdominal pain<sup>40</sup>. In this study, based on  
9  
10 extensive clinical practice, TEAS will be applied to abdominal acupoints, which is safer  
11  
12 than electroacupuncture based on acupuncture on the meridians of the distal extremities;  
13  
14 moreover, the SP15 and ST21 chosen for abdominal surgery are unconventional  
15  
16 incision positions that facilitate manipulation. Additionally, they are both antiemetic,  
17  
18 promote gastrointestinal motility, and relieve abdominal pain. Some previous studies  
19  
20 on acupuncture for gastrointestinal symptoms have shown that SA although have some  
21  
22 placebo effect, but EA might have greater benefits than SA(Sham-acupuncture)<sup>15 41 42</sup>,  
23  
24 so we did not include sham control in this study. Therefore, the main purpose of this  
25  
26 three-arm randomised controlled study is to evaluate whether TEAS combined with EA  
27  
28 therapy is effective at allowing rapid recovery after laparotomy for gastrointestinal  
29  
30 surgery is more effective and beneficial, and further improving patient satisfaction.  
31  
32  
33  
34  
35  
36  
37  
38  
39  
40  
41  
42  
43  
44  
45  
46

## 47 **ETHICS AND DISSEMINATION**

48  
49 Personal information and study data of all participants will be recorded in case report forms.  
50  
51 Moreover, data involving patient privacy will be anonymized, protected by code, and securely kept  
52  
53 in a locked cabinet in the WCHSU accessed only by the research team. Upon completion of the trial  
54  
55 and data verification, the case report forms will be transferred to the Science and Technology  
56  
57 Department of Sichuan Province for safe archival purposes for 10 years before being destroyed.  
58  
59  
60

1  
2  
3  
4 Data for use or analysis following study completion will be available from the corresponding author  
5  
6 upon reasonable request. The study results will be presented at national and international scientific  
7  
8 conferences and submitted for publication in a peer-reviewed journal.  
9

10  
11 This study has been approved by the Ethics Committee on Biomedical Research, West China  
12  
13 Hospital of Sichuan University in April 2021. The approval number is 2021 (52). The trial protocol  
14  
15 strictly adheres to the principles of the latest Declaration of Helsinki. Patient consent for publication  
16  
17 is not required.  
18  
19  
20  
21  
22  
23  
24  
25  
26

27 **Authors' contributions:** HL and QW contributed equally to this article, participated in the study  
28  
29 design, drafted the manuscript, and recruited patients. L-y L and Y-m Z are responsible for the  
30  
31 treatment of patients. H-q H and YH are responsible for collecting the data. NL and X-t W are  
32  
33 responsible for monitoring this study. All authors contributed to manuscript revision and have read  
34  
35 and approved the submitted version.  
36  
37  
38  
39  
40  
41  
42

43 **Funding:** This study will be supported by the Sichuan Science and Technology Program (grant  
44  
45 number: 2021YFS0254).  
46  
47  
48  
49

50 **Disclaimer:** The funding bodies are not involved in study design, data collection, analysis,  
51  
52 interpretation of results, and the manuscript.  
53  
54  
55  
56  
57

58 **Competing interests:** The authors declare that they have no competing interests.  
59  
60

1  
2  
3  
4  
5  
6  
7 **Provenance and peer review:** Not commissioned; externally peer-reviewed.  
8  
9  
10  
11  
12

## 13 REFERENCES

- 14 1. Leslie JB, Viscusi ER, Pergolizzi JV, Jr., et al. Anesthetic Routines: The Anesthesiologist's Role in GI  
15 Recovery and Postoperative Ileus. *Adv Prev Med* 2011;2011:976904. doi:  
16 10.4061/2011/976904 [published Online First: 2011/10/13]
- 17 2. Gan TJ, Belani KG, Bergese S, et al. Fourth Consensus Guidelines for the Management of  
18 Postoperative Nausea and Vomiting. *Anesth Analg* 2020;131(2):411-48. doi:  
19 10.1213/ANE.0000000000004833 [published Online First: 2020/05/30]
- 20 3. Bragg D, El-Sharkawy AM, Psaltis E, et al. Postoperative ileus: Recent developments in  
21 pathophysiology and management. *Clinical nutrition (Edinburgh, Scotland)* 2015;34(3):367-76.  
22 doi: 10.1016/j.clnu.2015.01.016 [published Online First: 2015/03/31]
- 23 4. Ni CY, Wang ZH, Huang ZP, et al. Early enforced mobilization after liver resection: A prospective  
24 randomized controlled trial. *International journal of surgery (London, England)* 2018;54(Pt  
25 A):254-58. doi: 10.1016/j.ijso.2018.04.060 [published Online First: 2018/05/13]
- 26 5. Ren QP, Luo YL, Xiao FM, et al. Effect of enhanced recovery after surgery program on patient-reported  
27 outcomes and function recovery in patients undergoing liver resection for hepatocellular  
28 carcinoma. *Medicine* 2020;99(20):e20062. doi: 10.1097/md.00000000000020062 [published  
29 Online First: 2020/05/24]
- 30 6. Harryman C, Plymale MA, Stearns E, et al. Enhanced value with implementation of an ERAS protocol  
31 for ventral hernia repair. *Surgical endoscopy* 2020;34(9):3949-55. doi: 10.1007/s00464-019-  
32 07166-2 [published Online First: 2019/10/03]
- 33 7. Medbery RL, Fernandez FG, Khullar OV. ERAS and patient reported outcomes in thoracic surgery: a  
34 review of current data. *Journal of thoracic disease* 2019;11(Suppl 7):S976-s86. doi:  
35 10.21037/jtd.2019.04.08 [published Online First: 2019/06/12]
- 36 8. Noba L, Rodgers S, Chandler C, et al. Enhanced Recovery After Surgery (ERAS) Reduces Hospital Costs  
37 and Improve Clinical Outcomes in Liver Surgery: a Systematic Review and Meta-Analysis.  
38 *Journal of gastrointestinal surgery : official journal of the Society for Surgery of the Alimentary  
39 Tract* 2020;24(4):918-32. doi: 10.1007/s11605-019-04499-0 [published Online First:  
40 2020/01/05]
- 41 9. Ljungqvist O, Scott M, Fearon KC. Enhanced Recovery After Surgery: A Review. *JAMA surgery*  
42 2017;152(3):292-98. doi: 10.1001/jamasurg.2016.4952 [published Online First: 2017/01/18]
- 43 10. Wilmore DW, Kehlet H. Management of patients in fast track surgery. *BMJ (Clinical research ed)*  
44 2001;322(7284):473-6. doi: 10.1136/bmj.322.7284.473 [published Online First: 2001/02/27]
- 45 11. McLeod RS, Aarts MA, Chung F, et al. Development of an Enhanced Recovery After Surgery Guideline  
46 and Implementation Strategy Based on the Knowledge-to-action Cycle. *Annals of surgery*  
47 2015;262(6):1016-25. doi: 10.1097/sla.0000000000001067 [published Online First:  
48 2015/02/19]
- 49  
50  
51  
52  
53  
54  
55  
56  
57  
58  
59  
60

12. Prabhakaran S, Misra S, Magila M, et al. Randomized Controlled Trial Comparing the Outcomes of Enhanced Recovery After Surgery and Standard Recovery Pathways in Laparoscopic Sleeve Gastrectomy. *Obes Surg* 2020;30(9):3273-79. doi: 10.1007/s11695-020-04585-2 [published Online First: 2020/04/16]
13. Miedema BW, Johnson JO. Methods for decreasing postoperative gut dysmotility. *Lancet Oncol* 2003;4(6):365-72. doi: 10.1016/s1470-2045(03)01118-5 [published Online First: 2003/06/06]
14. Li H, He T, Xu Q, et al. Acupuncture and regulation of gastrointestinal function. *World journal of gastroenterology* 2015;21(27):8304-13. doi: 10.3748/wjg.v21.i27.8304 [published Online First: 2015/07/29]
15. Ng SS, Leung WW, Mak TW, et al. Electroacupuncture reduces duration of postoperative ileus after laparoscopic surgery for colorectal cancer. *Gastroenterology* 2013;144(2):307-13.e1. doi: 10.1053/j.gastro.2012.10.050 [published Online First: 2012/11/13]
16. Takahashi T. Mechanism of acupuncture on neuromodulation in the gut--a review. *Neuromodulation : journal of the International Neuromodulation Society* 2011;14(1):8-12; discussion 12. doi: 10.1111/j.1525-1403.2010.00295.x [published Online First: 2011/10/14]
17. Tada H, Fujita M, Harris M, et al. Neural mechanism of acupuncture-induced gastric relaxations in rats. *Digestive diseases and sciences* 2003;48(1):59-68. doi: 10.1023/a:1021730314068 [published Online First: 2003/03/21]
18. Yang NN, Ye Y, Tian ZX, et al. Effects of electroacupuncture on the intestinal motility and local inflammation are modulated by acupoint selection and stimulation frequency in postoperative ileus mice. *Neurogastroenterol Motil* 2020;32(5):e13808. doi: 10.1111/nmo.13808 [published Online First: 2020/03/03]
19. Jie Ma, Yunxiao Wang, Dan Fan, et al. Clinical Study of Acupoint Catgut Embedding in the treatment of Chronic Functional Constipation. *Journal of Sichuan of Traditional Chinese Medicine* 2015;33(10):161-162. [published Online First: 2015/10/15]
20. Jian-hua. S. Clinical Observation of Acupuncture plus Flash Cupping for Gastroparesis in Senile Type 2 Diabetes. *Shanghai J Acu-mox* 2018;37(10):1132-1135. doi: 10.13460/j.issn.1005-0957.2018.10.1132 [published Online First: 2018/10/16]
21. Zhang WB, Wu A, Litscher G, et al. Effects and mechanism of acupuncture based on the principle of meridians. *Evid Based Complement Alternat Med* 2013;2013:684027. doi: 10.1155/2013/684027 [published Online First: 2014/01/01]
22. Zhao ZQ. Neural mechanism underlying acupuncture analgesia. *Progress in neurobiology* 2008;85(4):355-75. doi: 10.1016/j.pneurobio.2008.05.004 [published Online First: 2008/06/28]
23. Hauck M, Schröder S, Meyer-Hamme G, et al. Acupuncture analgesia involves modulation of pain-induced gamma oscillations and cortical network connectivity. *Scientific reports* 2017;7(1):16307. doi: 10.1038/s41598-017-13633-4 [published Online First: 2017/11/28]
24. Cui X, Liu K, Xu D, et al. Mast cell deficiency attenuates acupuncture analgesia for mechanical pain using c-kit gene mutant rats. *Journal of pain research* 2018;11:483-95. doi: 10.2147/jpr.S152015 [published Online First: 2018/03/20]
25. Wu MS, Chen KH, Chen IF, et al. The Efficacy of Acupuncture in Post-Operative Pain Management: A Systematic Review and Meta-Analysis. *PloS one* 2016;11(3):e0150367. doi: 10.1371/journal.pone.0150367 [published Online First: 2016/03/10]
26. Capodice JL, Parkhomenko E, Tran TY, et al. A Randomized, Double-Blind, Sham-Controlled Study Assessing Electroacupuncture for the Management of Postoperative Pain after Percutaneous

- Nephrolithotomy. *Journal of endourology* 2019;33(3):194-200. doi: 10.1089/end.2018.0665 [published Online First: 2019/01/30]
27. Chen CC, Yang CC, Hu CC, et al. Acupuncture for pain relief after total knee arthroplasty: a randomized controlled trial. *Regional anesthesia and pain medicine* 2015;40(1):31-6. doi: 10.1097/aap.000000000000138 [published Online First: 2014/08/28]
28. Asmussen S, Maybauer DM, Chen JD, et al. Effects of Acupuncture in Anesthesia for Craniotomy: A Meta-Analysis. *Journal of neurosurgical anesthesiology* 2017;29(3):219-27. doi: 10.1097/ana.000000000000290 [published Online First: 2016/03/12]
29. Mitra S, Carlyle D, Kodumudi G, et al. New Advances in Acute Postoperative Pain Management. *Curr Pain Headache Rep* 2018;22(5):35. doi: 10.1007/s11916-018-0690-8 [published Online First: 2018/04/06]
30. Kovac AL. Update on the management of postoperative nausea and vomiting. *Drugs* 2013;73(14):1525-47. doi: 10.1007/s40265-013-0110-7 [published Online First: 2013/09/24]
31. Lee A, Chan SK, Fan LT. Stimulation of the wrist acupuncture point PC6 for preventing postoperative nausea and vomiting. *The Cochrane database of systematic reviews* 2015;2015(11):Cd003281. doi: 10.1002/14651858.CD003281.pub4 [published Online First: 2015/11/03]
32. Kim YH, Kim KS, Lee HJ, et al. The efficacy of several neuromuscular monitoring modes at the P6 acupuncture point in preventing postoperative nausea and vomiting. *Anesth Analg* 2011;112(4):819-23. doi: 10.1213/ANE.0b013e31820f819e [published Online First: 2011/03/10]
33. Gan TJ, Jiao KR, Zenn M, et al. A randomized controlled comparison of electro-acupoint stimulation or ondansetron versus placebo for the prevention of postoperative nausea and vomiting. *Anesth Analg* 2004;99(4):1070-5, table of contents. doi: 10.1213/01.Ane.0000130355.91214.9e [published Online First: 2004/09/24]
34. Chen KB, Huang Y, Jin XL, et al. Electroacupuncture or transcutaneous electroacupuncture for postoperative ileus after abdominal surgery: A systematic review and meta-analysis. *Int J Surg* 2019;70:93-101. doi: 10.1016/j.ijsu.2019.08.034 [published Online First: 2019/09/09]
35. Chen J, Zhang Y, Li X, et al. Efficacy of transcutaneous electrical acupoint stimulation combined with general anesthesia for sedation and postoperative analgesia in minimally invasive lung cancer surgery: A randomized, double-blind, placebo-controlled trial. *Thorac Cancer* 2020;11(4):928-34. doi: 10.1111/1759-7714.13343 [published Online First: 2020/02/18]
36. Hou L, Xu L, Shi Y, et al. Effect of electric acupoint stimulation on gastrointestinal hormones and motility among geriatric postoperative patients with gastrointestinal tumors. *J Tradit Chin Med* 2016;36(4):450-5. doi: 10.1016/s0254-6272(16)30061-9 [published Online First: 2017/05/02]
37. Sun K, Xing T, Zhang F, et al. Perioperative Transcutaneous Electrical Acupoint Stimulation for Postoperative Pain Relief Following Laparoscopic Surgery: A Randomized Controlled Trial. *Clin J Pain* 2017;33(4):340-47. doi: 10.1097/ajp.0000000000000400 [published Online First: 2016/07/21]
38. Committee CNSA, Committee CISM. National standard of the people's Republic of China "Nomenclature and Location of Acupuncture Points"(GB / T 12346-2006). Beijing: China Standards Press, 2006.
39. Xin C, Sun JH. [The value of acupuncture-moxibustion in enhance recovery after surgery]. *Zhongguo Zhen Jiu* 2020;40(6):679-82. doi: 10.13703/j.0255-2930.20190501-0005 [published Online First: 2020/06/17]

- 1  
2  
3  
4  
5  
6  
7  
8  
9  
10  
11  
12  
13  
14  
15  
16  
17  
18  
19  
20  
21  
22  
23  
24  
25  
26  
27  
28  
29  
30  
31  
32  
33  
34  
35  
36  
37  
38  
39  
40  
41  
42  
43  
44  
45  
46  
47  
48  
49  
50  
51  
52  
53  
54  
55  
56  
57  
58  
59  
60
40. Li HJ, Zhao Y, Wen Q, et al. [Comparison of Clinical Effects of Electroacupuncture of Abdominal and Limb Acupoints in the Treatment of Acute Pancreatitis]. *Zhen Ci Yan Jiu* 2018;43(11):725-9. doi: 10.13702/j.1000-0607.170351 [published Online First: 2018/12/27]
41. Liu Z, Yan S, Wu J, et al. Acupuncture for Chronic Severe Functional Constipation: A Randomized Trial. *Ann Intern Med* 2016;165(11):761-69. doi: 10.7326/m15-3118 [published Online First: 2016/09/13]
42. Wang CP, Kao CH, Chen WK, et al. A single-blinded, randomized pilot study evaluating effects of electroacupuncture in diabetic patients with symptoms suggestive of gastroparesis. *J Altern Complement Med* 2008;14(7):833-9. doi: 10.1089/acm.2008.0107 [published Online First: 2008/08/30]

### Figure Legends

Figure 1: Flowchart of the study protocol.

Figure 2: Instrument and parameter.

Figure 3: Localization of acupoints and electrode connection.

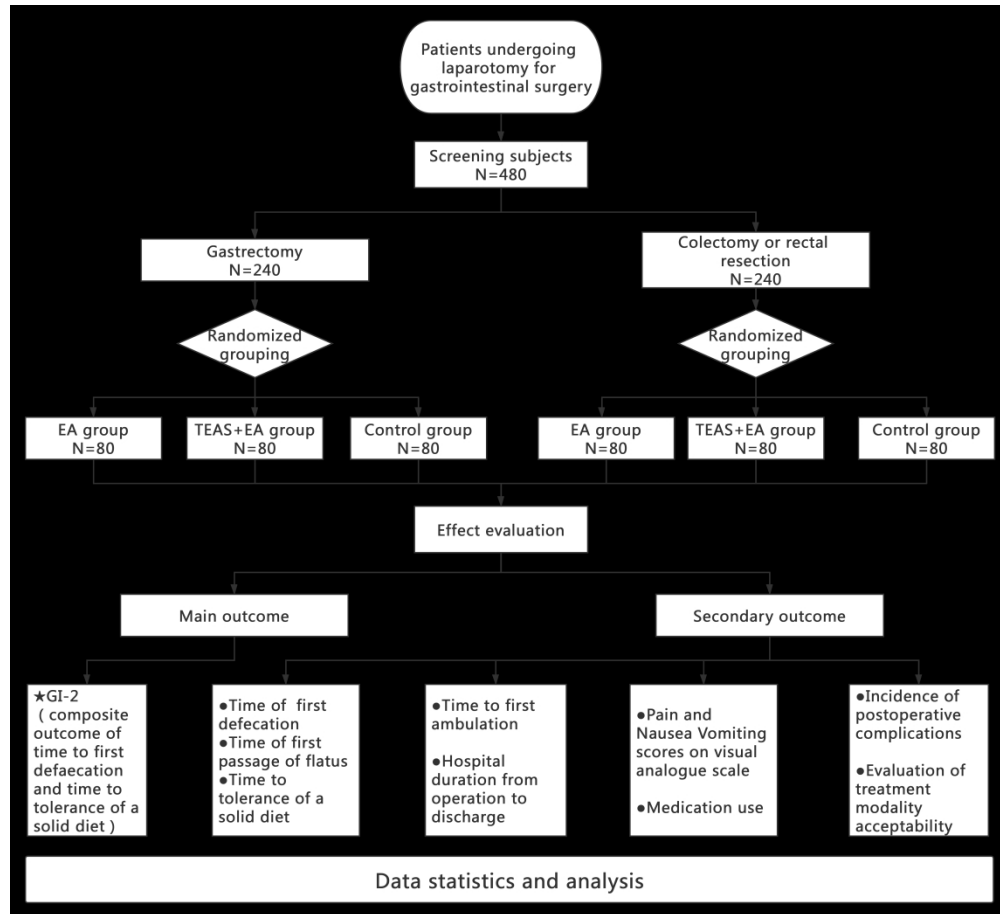

Figure 1: Flowchart of the study protocol.

1711x1560mm (72 x 72 DPI)

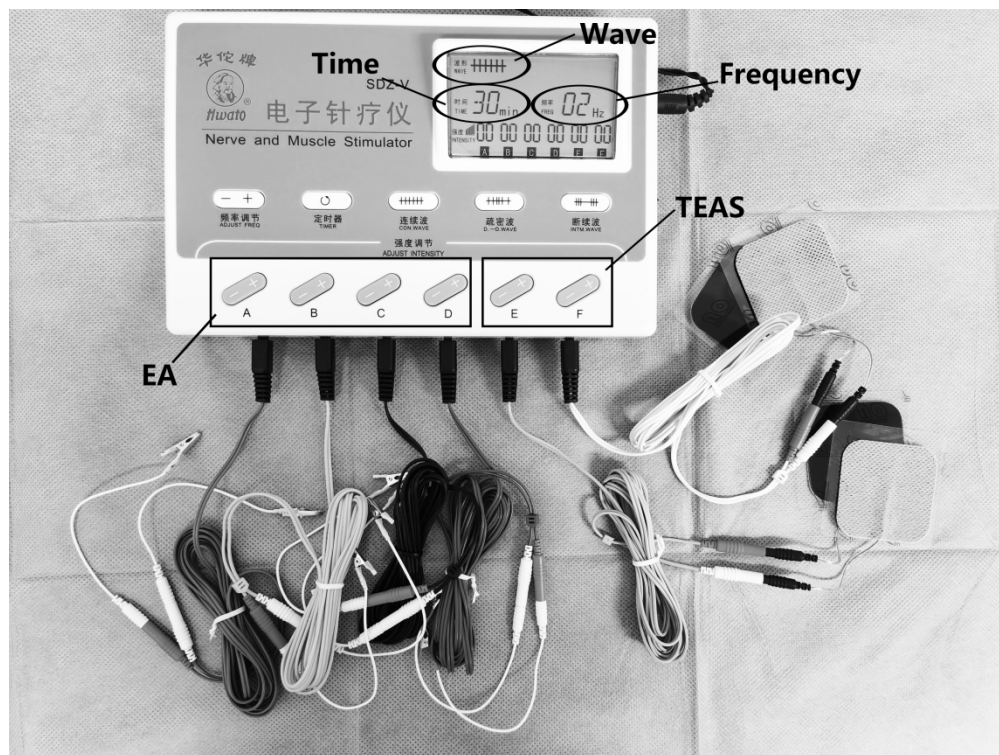

Figure 2: Instrument and parameter.

1286x965mm (72 x 72 DPI)



1  
2  
3  
4  
5  
6  
7  
8  
9  
10  
11  
12  
13  
14  
15  
16  
17  
18  
19  
20  
21  
22  
23  
24  
25  
26  
27  
28  
29  
30  
31  
32  
33  
34  
35  
36  
37  
38  
39  
40  
41  
42  
43  
44  
45  
46  
47  
48  
49  
50  
51  
52  
53  
54  
55  
56  
57  
58  
59  
60

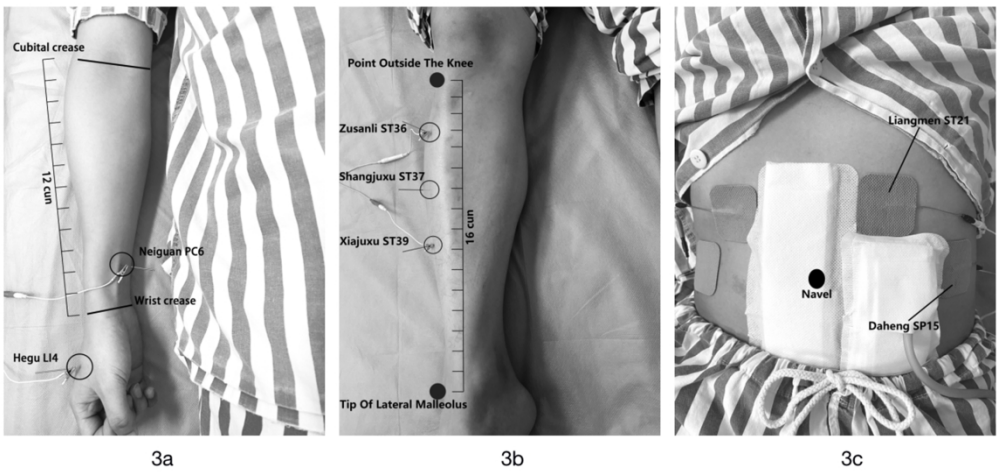

Figure 3: Localization of acupoints and electrode connection.

1492x704mm (72 x 72 DPI)

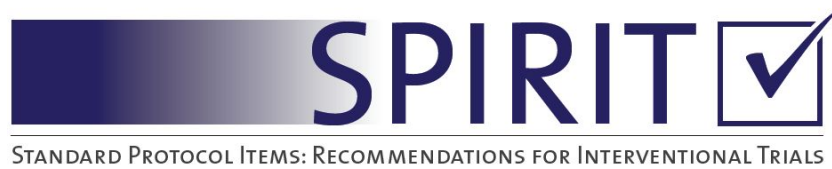

STANDARD PROTOCOL ITEMS: RECOMMENDATIONS FOR INTERVENTIONAL TRIALS

SPIRIT 2013 Checklist: Recommended items to address in a clinical trial protocol and related documents\*

| Section/item                      | Item No | Description                                                                                                                                                                                                                                                                              | Page Number on which item is reported |
|-----------------------------------|---------|------------------------------------------------------------------------------------------------------------------------------------------------------------------------------------------------------------------------------------------------------------------------------------------|---------------------------------------|
| <b>Administrative information</b> |         |                                                                                                                                                                                                                                                                                          |                                       |
| Title                             | 1       | Descriptive title identifying the study design, population, interventions, and, if applicable, trial acronym                                                                                                                                                                             | 1                                     |
| Trial registration                | 2a      | Trial identifier and registry name. If not yet registered, name of intended registry                                                                                                                                                                                                     | 3                                     |
|                                   | 2b      | All items from the World Health Organization Trial Registration Data Set                                                                                                                                                                                                                 | 3                                     |
| Protocol version                  | 3       | Date and version identifier                                                                                                                                                                                                                                                              | 7                                     |
| Funding                           | 4       | Sources and types of financial, material, and other support                                                                                                                                                                                                                              | 16                                    |
| Roles and responsibilities        | 5a      | Names, affiliations, and roles of protocol contributors                                                                                                                                                                                                                                  | 1                                     |
|                                   | 5b      | Name and contact information for the trial sponsor                                                                                                                                                                                                                                       | 1                                     |
|                                   | 5c      | Role of study sponsor and funders, if any, in study design; collection, management, analysis, and interpretation of data; writing of the report; and the decision to submit the report for publication, including whether they will have ultimate authority over any of these activities | 15                                    |

|                                                           |     |                                                                                                                                                                                                                                                                  |      |
|-----------------------------------------------------------|-----|------------------------------------------------------------------------------------------------------------------------------------------------------------------------------------------------------------------------------------------------------------------|------|
|                                                           | 5d  | Composition, roles, and responsibilities of the coordinating centre, steering committee, endpoint adjudication committee, data management team, and other individuals or groups overseeing the trial, if applicable (see Item 21a for data monitoring committee) | N/A  |
| <b>Introduction</b>                                       |     |                                                                                                                                                                                                                                                                  |      |
| Background and rationale                                  | 6a  | Description of research question and justification for undertaking the trial, including summary of relevant studies (published and unpublished) examining benefits and harms for each intervention                                                               | 4-7  |
|                                                           | 6b  | Explanation for choice of comparators                                                                                                                                                                                                                            | 5    |
| Objectives                                                | 7   | Specific objectives or hypotheses                                                                                                                                                                                                                                | 2    |
| Trial design                                              | 8   | Description of trial design including type of trial (eg, parallel group, crossover, factorial, single group), allocation ratio, and framework (eg, superiority, equivalence, noninferiority, exploratory)                                                        | 7    |
| <b>Methods: Participants, interventions, and outcomes</b> |     |                                                                                                                                                                                                                                                                  |      |
| Study setting                                             | 9   | Description of study settings (eg, community clinic, academic hospital) and list of countries where data will be collected. Reference to where list of study sites can be obtained                                                                               | 7    |
| Eligibility criteria                                      | 10  | Inclusion and exclusion criteria for participants. If applicable, eligibility criteria for study centres and individuals who will perform the interventions (eg, surgeons, psychotherapists)                                                                     | 7-8  |
| Interventions                                             | 11a | Interventions for each group with sufficient detail to allow replication, including how and when they will be administered                                                                                                                                       | 9-11 |
|                                                           | 11b | Criteria for discontinuing or modifying allocated interventions for a given trial participant (eg, drug dose change in response to harms, participant request, or improving/worsening disease)                                                                   | 9-11 |

|                                                                     |     |                                                                                                                                                                                                                                                                                                                                                                                |      |
|---------------------------------------------------------------------|-----|--------------------------------------------------------------------------------------------------------------------------------------------------------------------------------------------------------------------------------------------------------------------------------------------------------------------------------------------------------------------------------|------|
|                                                                     | 11c | Strategies to improve adherence to intervention protocols, and any procedures for monitoring adherence (eg, drug tablet return, laboratory tests)                                                                                                                                                                                                                              | 9-11 |
|                                                                     | 11d | Relevant concomitant care and interventions that are permitted or prohibited during the trial                                                                                                                                                                                                                                                                                  | 9-11 |
| Outcomes                                                            | 12  | Primary, secondary, and other outcomes, including the specific measurement variable (eg, systolic blood pressure), analysis metric (eg, change from baseline, final value, time to event), method of aggregation (eg, median, proportion), and time point for each outcome. Explanation of the clinical relevance of chosen efficacy and harm outcomes is strongly recommended | 11   |
| Participant timeline                                                | 13  | Time schedule of enrolment, interventions (including any run-ins and washouts), assessments, and visits for participants. A schematic diagram is highly recommended (see Figure)                                                                                                                                                                                               | 9-11 |
| Sample size                                                         | 14  | Estimated number of participants needed to achieve study objectives and how it was determined, including clinical and statistical assumptions supporting any sample size calculations                                                                                                                                                                                          | 12   |
| Recruitment                                                         | 15  | Strategies for achieving adequate participant enrolment to reach target sample size                                                                                                                                                                                                                                                                                            | 7    |
| <b>Methods: Assignment of interventions (for controlled trials)</b> |     |                                                                                                                                                                                                                                                                                                                                                                                |      |
| Allocation:                                                         |     |                                                                                                                                                                                                                                                                                                                                                                                |      |
| Sequence generation                                                 | 16a | Method of generating the allocation sequence (eg, computer-generated random numbers), and list of any factors for stratification. To reduce predictability of a random sequence, details of any planned restriction (eg, blocking) should be provided in a separate document that is unavailable to those who enrol participants or assign interventions                       | 8-9  |

|                                                           |     |                                                                                                                                                                                                                                                                                                                                                                                                              |     |
|-----------------------------------------------------------|-----|--------------------------------------------------------------------------------------------------------------------------------------------------------------------------------------------------------------------------------------------------------------------------------------------------------------------------------------------------------------------------------------------------------------|-----|
| Allocation concealment mechanism                          | 16b | Mechanism of implementing the allocation sequence (eg, central telephone; sequentially numbered, opaque, sealed envelopes), describing any steps to conceal the sequence until interventions are assigned                                                                                                                                                                                                    | 8-9 |
| Implementation                                            | 16c | Who will generate the allocation sequence, who will enrol participants, and who will assign participants to interventions                                                                                                                                                                                                                                                                                    | 8-9 |
| Blinding (masking)                                        | 17a | Who will be blinded after assignment to interventions (eg, trial participants, care providers, outcome assessors, data analysts), and how                                                                                                                                                                                                                                                                    | 8-9 |
|                                                           | 17b | If blinded, circumstances under which unblinding is permissible, and procedure for revealing a participant's allocated intervention during the trial                                                                                                                                                                                                                                                         | 8-9 |
| <b>Methods: Data collection, management, and analysis</b> |     |                                                                                                                                                                                                                                                                                                                                                                                                              |     |
| Data collection methods                                   | 18a | Plans for assessment and collection of outcome, baseline, and other trial data, including any related processes to promote data quality (eg, duplicate measurements, training of assessors) and a description of study instruments (eg, questionnaires, laboratory tests) along with their reliability and validity, if known. Reference to where data collection forms can be found, if not in the protocol | 11  |
|                                                           | 18b | Plans to promote participant retention and complete follow-up, including list of any outcome data to be collected for participants who discontinue or deviate from intervention protocols                                                                                                                                                                                                                    | 11  |
| Data management                                           | 19  | Plans for data entry, coding, security, and storage, including any related processes to promote data quality (eg, double data entry; range checks for data values). Reference to where details of data management procedures can be found, if not in the protocol                                                                                                                                            | 15  |

|                                                          |                                 |     |                                                                                                                                                                                                                                                                                                                                       |       |
|----------------------------------------------------------|---------------------------------|-----|---------------------------------------------------------------------------------------------------------------------------------------------------------------------------------------------------------------------------------------------------------------------------------------------------------------------------------------|-------|
| 1<br>2<br>3<br>4<br>5<br>6<br>7                          | Statistical methods             | 20a | Statistical methods for analysing primary and secondary outcomes. Reference to where other details of the statistical analysis plan can be found, if not in the protocol                                                                                                                                                              | 13    |
| 8<br>9<br>10<br>11                                       |                                 | 20b | Methods for any additional analyses (eg, subgroup and adjusted analyses)                                                                                                                                                                                                                                                              | 13    |
| 12<br>13<br>14<br>15<br>16<br>17<br>18                   |                                 | 20c | Definition of analysis population relating to protocol non-adherence (eg, as randomised analysis), and any statistical methods to handle missing data (eg, multiple imputation)                                                                                                                                                       | 13    |
| 19<br>20<br>21                                           | <b>Methods: Monitoring</b>      |     |                                                                                                                                                                                                                                                                                                                                       |       |
| 22<br>23<br>24<br>25<br>26<br>27<br>28<br>29<br>30<br>31 | Data monitoring                 | 21a | Composition of data monitoring committee (DMC); summary of its role and reporting structure; statement of whether it is independent from the sponsor and competing interests; and reference to where further details about its charter can be found, if not in the protocol. Alternatively, an explanation of why a DMC is not needed | N/A   |
| 32<br>33<br>34<br>35<br>36<br>37<br>38                   |                                 | 21b | Description of any interim analyses and stopping guidelines, including who will have access to these interim results and make the final decision to terminate the trial                                                                                                                                                               | N/A   |
| 39<br>40<br>41<br>42<br>43<br>44                         | Harms                           | 22  | Plans for collecting, assessing, reporting, and managing solicited and spontaneously reported adverse events and other unintended effects of trial interventions or trial conduct                                                                                                                                                     | 11-12 |
| 45<br>46<br>47<br>48<br>49                               | Auditing                        | 23  | Frequency and procedures for auditing trial conduct, if any, and whether the process will be independent from investigators and the sponsor                                                                                                                                                                                           | N/A   |
| 50<br>51<br>52<br>53                                     | <b>Ethics and dissemination</b> |     |                                                                                                                                                                                                                                                                                                                                       |       |
| 54<br>55<br>56<br>57<br>58<br>59<br>60                   | Research ethics approval        | 24  | Plans for seeking research ethics committee/institutional review board (REC/IRB) approval                                                                                                                                                                                                                                             | 15    |

|                                                    |                               |     |                                                                                                                                                                                                                                                                                     |     |
|----------------------------------------------------|-------------------------------|-----|-------------------------------------------------------------------------------------------------------------------------------------------------------------------------------------------------------------------------------------------------------------------------------------|-----|
| 1<br>2<br>3<br>4<br>5<br>6<br>7<br>8               | Protocol amendments           | 25  | Plans for communicating important protocol modifications (eg, changes to eligibility criteria, outcomes, analyses) to relevant parties (eg, investigators, REC/IRBs, trial participants, trial registries, journals, regulators)                                                    | N/A |
| 9<br>10<br>11<br>12<br>13<br>14                    | Consent or assent             | 26a | Who will obtain informed consent or assent from potential trial participants or authorised surrogates, and how (see Item 32)                                                                                                                                                        | 7-8 |
| 15<br>16<br>17<br>18<br>19                         |                               | 26b | Additional consent provisions for collection and use of participant data and biological specimens in ancillary studies, if applicable                                                                                                                                               | N/A |
| 20<br>21<br>22<br>23<br>24<br>25<br>26             | Confidentiality               | 27  | How personal information about potential and enrolled participants will be collected, shared, and maintained in order to protect confidentiality before, during, and after the trial                                                                                                | 15  |
| 27<br>28<br>29<br>30                               | Declaration of interests      | 28  | Financial and other competing interests for principal investigators for the overall trial and each study site                                                                                                                                                                       | 16  |
| 31<br>32<br>33<br>34<br>35                         | Access to data                | 29  | Statement of who will have access to the final trial dataset, and disclosure of contractual agreements that limit such access for investigators                                                                                                                                     | 15  |
| 36<br>37<br>38<br>39<br>40                         | Ancillary and post-trial care | 30  | Provisions, if any, for ancillary and post-trial care, and for compensation to those who suffer harm from trial participation                                                                                                                                                       | 13  |
| 41<br>42<br>43<br>44<br>45<br>46<br>47<br>48<br>49 | Dissemination policy          | 31a | Plans for investigators and sponsor to communicate trial results to participants, healthcare professionals, the public, and other relevant groups (eg, via publication, reporting in results databases, or other data sharing arrangements), including any publication restrictions | 15  |
| 50<br>51<br>52<br>53<br>54                         |                               | 31b | Authorship eligibility guidelines and any intended use of professional writers                                                                                                                                                                                                      | 15  |
| 55<br>56<br>57<br>58<br>59<br>60                   |                               | 31c | Plans, if any, for granting public access to the full protocol, participant-level dataset, and statistical code                                                                                                                                                                     | 15  |

|                            |    |                                                                                                                                                                                                |     |
|----------------------------|----|------------------------------------------------------------------------------------------------------------------------------------------------------------------------------------------------|-----|
| <b>Appendices</b>          |    |                                                                                                                                                                                                |     |
| Informed consent materials | 32 | Model consent form and other related documentation given to participants and authorised surrogates                                                                                             | N/A |
| Biological specimens       | 33 | Plans for collection, laboratory evaluation, and storage of biological specimens for genetic or molecular analysis in the current trial and for future use in ancillary studies, if applicable | N/A |

\*It is strongly recommended that this checklist be read in conjunction with the SPIRIT 2013 Explanation & Elaboration for important clarification on the items. Amendments to the protocol should be tracked and dated. The SPIRIT checklist is copyrighted by the SPIRIT Group under the Creative Commons "[Attribution-NonCommercial-NoDerivs 3.0 Unported](https://creativecommons.org/licenses/by-nc-nd/3.0/)" license.
